# Supplementary material for: Transcriptomic Insights into Host Metabolism and Immunity Changes after Parasitization by Leptopilina myrica
Source: MDPI journal article supplement (doi:10.3390/insects15050352), 2024-05-14
Supplement: s1 [file s1]

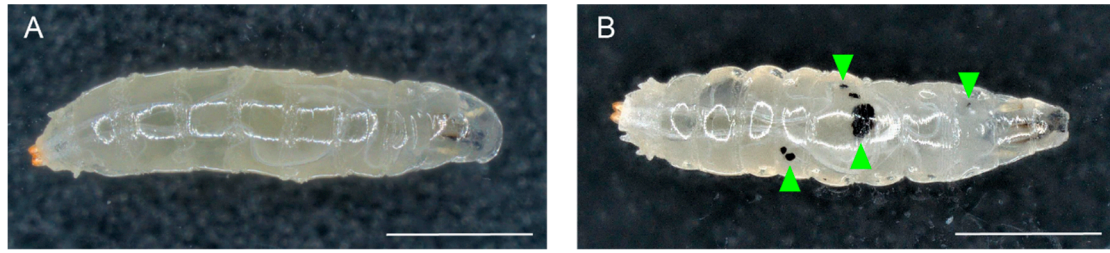

**Figure S1. *L. myrica* parasitization triggers melanotic response in infected fly larvae.**

Representative image of non-parasitized *Drosophila* third instar larvae (A) and those 48 h after parasitization by *L. myrica* (B). Green arrowheads in (B) represent melanotic capsule formation. Scale bars: 1 mm.

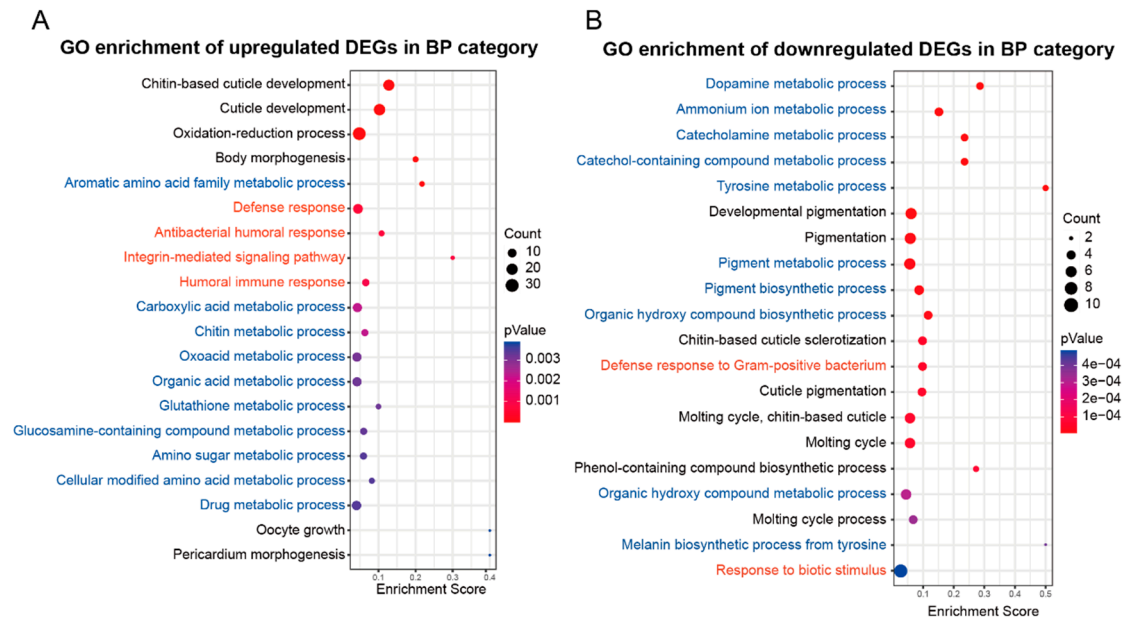

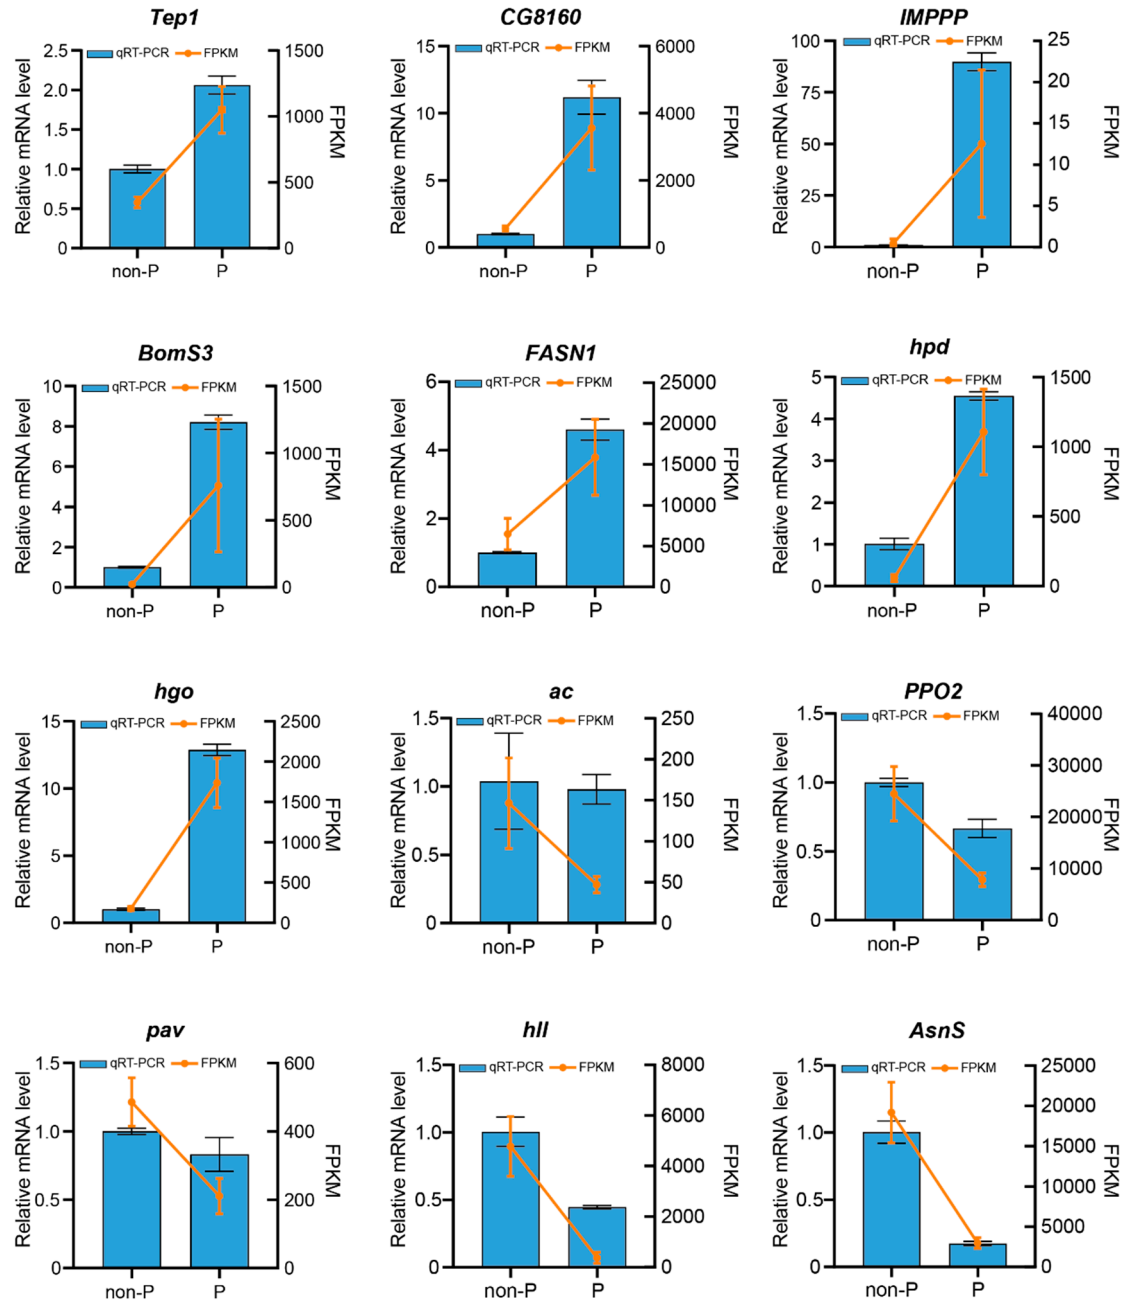

**Figure S3. Validation of RNA sequencing data by qRT-PCR.**

The blue bars indicate the relative expression levels of twelve genes by qRT-PCR. The red lines represent the expression levels obtained from the RNA-seq data using the FPKM method. The values represent the means  $\pm$  SDs of three independent experiments.
