# Supplementary material for: Transcriptomic Insights into Host Metabolism and Immunity Changes after Parasitization by Leptopilina myrica
Source: Insects. 2024 May 14;15(5):352. doi: 10.3390/insects15050352 (PMC11122121; doi:10.3390/insects15050352)
Supplement: Supplementary file 1 [file insects-15-00352-s001.zip › Supplementary Tables.xlsx]

## Sheet: Table S1
Table S1. Primers used for quantitative real-time PCR (5'-3')
Gene	Primers (5'-3')
Tep1	Forward primer	CCCGACCTGCCGTAATCGATAAG
	Reverse primer	CCACATACTTGTCCACCACTAGCAC
CG8160	Forward primer	GTGCCCCCAAATGAATTCGCAC
	Reverse primer	GACCAATTCCGCCGGAGAATTC
IMPPP	Forward primer	CGGGGTGAGCATGTGTACACC
	Reverse primer	CCGTTTCCAACGTCAACAGTGC
BomS3	Forward primer	CGCTCAATTTCATTGAGAACGTCGC
	Reverse primer	CCGTTGACAACTGATGCTAAGTGTTG
FASN1	Forward primer	GACCCCCAAGGATGGAGCAC
	Reverse primer	CGATCACCTCACGTTGGTGGG
hpd	Forward primer	GCTACCATCAAGACGTACGGCG
	Reverse primer	GGAACTGCAGGATTCTCTCGTACC
hgo	Forward primer	CTTTGACCATTGTGACCCCAGC
	Reverse primer	CGCAAAGCCATCCTCCTTGG
ac	Forward primer	CGACGACGAGGAGTCATCTTCG
	Reverse primer	GTTTTTTATTGGCGCCGGGACC
PPO2	Forward primer	GACACCAATGGAGGTCGTCCC
	Reverse primer	CGTTCTTCGGCGCCATGAAG
pav	Forward primer	CTTTTCACCTACGGCGTGACTG
	Reverse primer	CATCTCGTGTTGGCGCTCC
hll	Forward primer	GTGGTTCTTCGCGGAATTTGG
	Reverse primer	GATTACAGCCTTAAGACGTGGCAG
AsnS	Forward primer	GGAGCTTTCGGCTGAGATTGC
	Reverse primer	CTCACCCACATACATGGGTATAATGC
Actin 5C	Forward primer	GGCGCAGAGCAAGCGTGGTA
	Reverse primer	GGGTGCCACACGCAGCTCAT

## Sheet: Table S2
Table S2. The list of 16941 unigenes assembled across all 6 samples
GeneID	Gene name	P_vs_non-P.signaficant
FBgn0036810	CG6885	FALSE
FBgn0037191	CG14448	FALSE
FBgn0004635	rho	FALSE
FBgn0260646	CG42538	FALSE
FBgn0261992	CG42810	FALSE
FBgn0010583	dock	FALSE
FBgn0032906	RPA2	FALSE
FBgn0025583	BomS2	UP
FBgn0085397	Fili	FALSE
FBgn0030674	HUWE1	FALSE
FBgn0033233	Kdm4A	FALSE
FBgn0038427	ema	FALSE
FBgn0020503	CLIP-190	FALSE
FBgn0067864	Patj	FALSE
FBgn0035785	ppk26	FALSE
FBgn0039673	CG7568	FALSE
FBgn0051717	CG31717	FALSE
FBgn0030748	Traf-like	FALSE
FBgn0039207	CG5789	FALSE
FBgn0266438	PIG-Z	-
FBgn0250868	CG42239	FALSE
FBgn0267500	-	-
FBgn0040005	CG17883	FALSE
FBgn0039328	CHKov2	FALSE
FBgn0029524	CG3176	FALSE
FBgn0265852	-	FALSE
FBgn0032365	CG14929	FALSE
FBgn0030038	CG1440	FALSE
FBgn0267795	Frl	FALSE
FBgn0038481	CG17475	FALSE
FBgn0259959	Sfp26Ac	-
FBgn0012010	-	-
FBgn0265538	-	-
FBgn0263848	CG43709	FALSE
FBgn0033556	CG12343	FALSE
FBgn0050428	CG30428	FALSE
FBgn0027610	Dic1	UP
FBgn0265742	-	FALSE
FBgn0038834	RpS30	FALSE
FBgn0265816	-	FALSE
FBgn0037109	MED1	FALSE
FBgn0019686	lok	FALSE
FBgn0031987	CG12375	FALSE
FBgn0034548	CG13443	FALSE
FBgn0267551	asRNA:CR45891	-
FBgn0038092	beat-Vb	FALSE
FBgn0013772	Cyp6a8	UP
FBgn0029705	CG12693	FALSE
FBgn0038389	CG5516	FALSE
FBgn0038760	MED25	FALSE
FBgn0040784	karr	FALSE
FBgn0052450	CG32450	FALSE
FBgn0028671	Vha100-1	FALSE
FBgn0054043	CG34043	FALSE
FBgn0015614	CanB2	FALSE
FBgn0032450	CG5776	FALSE
FBgn0085472	CG34443	FALSE
FBgn0020299	stumps	FALSE
FBgn0015773	NetA	FALSE
FBgn0267148	-	FALSE
FBgn0260745	mfas	FALSE
FBgn0037472	CG10098	FALSE
FBgn0266171	pre-mod(mdg4)-AB	-
FBgn0031127	CG1835	FALSE
FBgn0262141	CG42867	FALSE
FBgn0263321	CG43402	FALSE
FBgn0030503	Tango2	FALSE
FBgn0267046	CG45490	FALSE
FBgn0028491	CG2930	FALSE
FBgn0030447	CG2200	FALSE
FBgn0015268	Nap1	FALSE
FBgn0032001	CG8360	FALSE
FBgn0033907	mRpS16	FALSE
FBgn0052758	Snx27	FALSE
FBgn0267542	asRNA:CR45882	-
FBgn0003742	tra2	FALSE
FBgn0038199	CCHa1	FALSE
FBgn0266157	-	FALSE
FBgn0040377	Vha36-3	FALSE
FBgn0026427	Su(var)2-HP2	FALSE
FBgn0266994	asRNA:CR45445	-
FBgn0011863	-	-
FBgn0264492	CkIIalpha	FALSE
FBgn0037648	CG11975	FALSE
FBgn0085327	CG34298	FALSE
FBgn0033154	CG1850	FALSE
FBgn0262870	axo	FALSE
FBgn0259184	CG42288	FALSE
FBgn0266097	-	FALSE
FBgn0259989	CG42486	-
FBgn0036731	CG6333	FALSE
FBgn0004580	Cbp53E	FALSE
FBgn0267249	-	FALSE
FBgn0005617	msl-1	FALSE
FBgn0259173	corn	FALSE
FBgn0030764	CG9777	FALSE
FBgn0261814	-	FALSE
FBgn0261831	CG42763	FALSE
FBgn0265934	-	FALSE
FBgn0027514	CG1024	FALSE
FBgn0032445	CG6153	FALSE
FBgn0033855	link	FALSE
FBgn0053630	CG33630	FALSE
FBgn0267074	asRNA:CR45518	-
FBgn0030586	CG12539	FALSE
FBgn0267205	-	-
FBgn0265868	-	FALSE
FBgn0032633	Lrch	FALSE
FBgn0011909	-	-
FBgn0037590	Or85b	FALSE
FBgn0047338	CG32148	FALSE
FBgn0015765	p38a	FALSE
FBgn0040812	CG8750	FALSE
FBgn0039188	Golgin84	FALSE
FBgn0028399	TMS1	FALSE
FBgn0259972	Sfp77F	FALSE
FBgn0037879	scpr-C	FALSE
FBgn0065101	-	-
FBgn0250907	Cht10	FALSE
FBgn0260767	CG42565	-
FBgn0035542	DOR	FALSE
FBgn0053494	CG33494	FALSE
FBgn0033434	CG1902	FALSE
FBgn0267348	LanB2	FALSE
FBgn0034106	CG9068	FALSE
FBgn0036124	CG7839	FALSE
FBgn0263451	asRNA:CR43474	FALSE
FBgn0011956	-	-
FBgn0263650	-	FALSE
FBgn0266885	-	FALSE
FBgn0003731	Egfr	FALSE
FBgn0037260	Mur82C	FALSE
FBgn0085336	CG34307	FALSE
FBgn0265081	asRNA:CR44192	FALSE
FBgn0250845	CG1288	FALSE
FBgn0029857	wuho	FALSE
FBgn0263290	-	FALSE
FBgn0051648	CG31648	FALSE
FBgn0287225	bor	FALSE
FBgn0035928	CG13310	FALSE
FBgn0285896	btl	FALSE
FBgn0267485	asRNA:CR45835	FALSE
FBgn0261508	CG42656	FALSE
FBgn0051131	CG31131	FALSE
FBgn0034440	CG10073	FALSE
FBgn0261596	RpS24	FALSE
FBgn0263343	-	FALSE
FBgn0029877	CG17717	FALSE
FBgn0264875	-	FALSE
FBgn0032170	CG4658	FALSE
FBgn0025608	Faf2	FALSE
FBgn0036411	Sox21a	FALSE
FBgn0267067	-	FALSE
FBgn0035360	CG1246	FALSE
FBgn0037431	CG17917	FALSE
FBgn0053826	His2A:CG33826	-
FBgn0053272	CG33272	FALSE
FBgn0030833	CG8915	FALSE
FBgn0004588	Eig71Ea	DOWN
FBgn0031782	WDR79	FALSE
FBgn0036772	CG5290	FALSE
FBgn0036752	Adgf-A	FALSE
FBgn0011770	Gip	FALSE
FBgn0267915	-	FALSE
FBgn0032343	CG6201	FALSE
FBgn0052392	Rsph3	FALSE
FBgn0037870	CG18577	FALSE
FBgn0031562	CG3604	FALSE
FBgn0000157	Dll	FALSE
FBgn0034634	CG10494	FALSE
FBgn0040279	Osi14	FALSE
FBgn0038423	CG10317	FALSE
FBgn0004456	mew	FALSE
FBgn0015754	Lis-1	FALSE
FBgn0026398	Or22a	FALSE
FBgn0263446	asRNA:CR43469	-
FBgn0002917	na	FALSE
FBgn0051675	CG31675	FALSE
FBgn0086371	poly	FALSE
FBgn0034345	CG5174	FALSE
FBgn0036936	CG14185	FALSE
FBgn0002873	mud	-
FBgn0029657	CG12535	FALSE
FBgn0039739	RpS28a	FALSE
FBgn0259712	CG42366	FALSE
FBgn0264516	CG43915	FALSE
FBgn0032974	CG3651	FALSE
FBgn0030570	CG12540	FALSE
FBgn0264077	Cnx14D	FALSE
FBgn0267194	-	FALSE
FBgn0001319	kn	FALSE
FBgn0029158	Las	FALSE
FBgn0028377	gdl-ORF39	-
FBgn0260237	BBIP1	-
FBgn0033467	Pdrg1	FALSE
FBgn0031568	CG10019	FALSE
FBgn0026666	MagR	FALSE
FBgn0033249	CG11191	FALSE
FBgn0033167	CG1701	-
FBgn0037841	CG4565	FALSE
FBgn0037000	ZnT77C	FALSE
FBgn0039283	danr	FALSE
FBgn0036066	CG14160	FALSE
FBgn0264870	-	FALSE
FBgn0053733	-	-
FBgn0085390	Dgk	FALSE
FBgn0036139	CG6216	FALSE
FBgn0040694	CG14974	FALSE
FBgn0039723	CG15522	FALSE
FBgn0030573	nmdyn-D6	FALSE
FBgn0262354	CG43052	FALSE
FBgn0035028	Start1	FALSE
FBgn0085479	CG34450	FALSE
FBgn0034666	CG9294	FALSE
FBgn0036142	Adck5	FALSE
FBgn0266041	-	FALSE
FBgn0025697	santa-maria	FALSE
FBgn0039861	pasha	FALSE
FBgn0264565	-	FALSE
FBgn0260780	wisp	FALSE
FBgn0260722	-	FALSE
FBgn0260766	CG42564	FALSE
FBgn0259203	CG42307	-
FBgn0037992	CG4702	FALSE
FBgn0039249	CG11168	FALSE
FBgn0051627	CG31627	FALSE
FBgn0033931	Obp50e	FALSE
FBgn0053427	-	-
FBgn0035014	CG13581	FALSE
FBgn0052068	Adi1	FALSE
FBgn0036532	CG13445	UP
FBgn0262595	CheA56a	-
FBgn0086695	hd	FALSE
FBgn0034592	CG9406	FALSE
FBgn0053348	CheB42a	-
FBgn0036780	CG7330	FALSE
FBgn0040074	retinin	FALSE
FBgn0069242	eca	FALSE
FBgn0033058	CCHa2-R	FALSE
FBgn0050383	CG30383	FALSE
FBgn0283545	vilya	FALSE
FBgn0030120	CG17440	FALSE
FBgn0031530	Pgant2	FALSE
FBgn0250825	CG34241	FALSE
FBgn0029925	CG3040	FALSE
FBgn0031468	CG2975	FALSE
FBgn0083979	Ir10a	FALSE
FBgn0050016	CG30016	FALSE
FBgn0263659	-	FALSE
FBgn0039238	CG7016	FALSE
FBgn0261709	-	FALSE
FBgn0030837	CG8661	FALSE
FBgn0284252	Letm1	FALSE
FBgn0030944	CG6617	FALSE
FBgn0035538	DopEcR	FALSE
FBgn0266933	asRNA:CR45384	-
FBgn0001125	Got2	FALSE
FBgn0032058	CG9289	FALSE
FBgn0031279	CG3544	FALSE
FBgn0050354	UQCR-11L	FALSE
FBgn0086757	cbs	FALSE
FBgn0259938	cwo	FALSE
FBgn0020416	Idgf1	FALSE
FBgn0265866	-	FALSE
FBgn0024319	Nach	FALSE
FBgn0264477	-	-
FBgn0034270	PIG-A	FALSE
FBgn0053369	-	-
FBgn0052100	CG32100	FALSE
FBgn0264270	Sxl	FALSE
FBgn0032859	Arpc2	FALSE
FBgn0267707	-	FALSE
FBgn0262478	CG43068	FALSE
FBgn0028983	Spn55B	FALSE
FBgn0032111	CG13110	FALSE
FBgn0085415	CG34386	FALSE
FBgn0266445	CG45075	-
FBgn0030077	CG15365	FALSE
FBgn0035558	CG11357	FALSE
FBgn0030326	CG2444	DOWN
FBgn0053757	CG33757	FALSE
FBgn0014879	Set	FALSE
FBgn0053784	CG33784	FALSE
FBgn0039747	AdoR	FALSE
FBgn0263046	CG43341	-
FBgn0038201	PK1-R	FALSE
FBgn0050476	ave	FALSE
FBgn0032656	CG5674	FALSE
FBgn0030793	Rai1	FALSE
FBgn0023172	RhoGEF2	FALSE
FBgn0023545	PIG-K	FALSE
FBgn0265262	Vha68-1	FALSE
FBgn0036227	CG17826	FALSE
FBgn0030578	CG5347	FALSE
FBgn0032746	CG10470	FALSE
FBgn0053325	CG33325	FALSE
FBgn0036208	CG10361	FALSE
FBgn0085387	shakB	FALSE
FBgn0024912	agt	FALSE
FBgn0267156	-	FALSE
FBgn0030814	CG4955	FALSE
FBgn0264982	-	FALSE
FBgn0040153	l(1)G0469	FALSE
FBgn0032869	CG17470	FALSE
FBgn0034389	Mctp	FALSE
FBgn0002593	RpLP1	FALSE
FBgn0011884	-	FALSE
FBgn0001222	Hsf	FALSE
FBgn0033543	CG12338	FALSE
FBgn0033813	fsd	FALSE
FBgn0267643	-	FALSE
FBgn0284231	CG46315	-
FBgn0053360	-	-
FBgn0039443	TwdlS	FALSE
FBgn0260944	Rbp1	FALSE
FBgn0040066	wds	FALSE
FBgn0270926	AsnS	DOWN
FBgn0051718	Ir31a	FALSE
FBgn0030659	CG9215	FALSE
FBgn0265157	-	FALSE
FBgn0033190	Gpo2	FALSE
FBgn0033079	Fmo-2	UP
FBgn0035719	tow	FALSE
FBgn0024555	flfl	FALSE
FBgn0032405	firl	DOWN
FBgn0039640	CG14516	FALSE
FBgn0031650	CG14044	FALSE
FBgn0035407	Asciz	FALSE
FBgn0034639	CG15673	FALSE
FBgn0286739	-	-
FBgn0264083	-	-
FBgn0266244	-	FALSE
FBgn0264999	-	FALSE
FBgn0032884	Pomp	FALSE
FBgn0053801	His1:CG33801	-
FBgn0036627	Gagr	FALSE
FBgn0264839	asRNA:CR44047	FALSE
FBgn0010379	Akt1	FALSE
FBgn0038286	CG6966	FALSE
FBgn0031516	CG9663	FALSE
FBgn0052640	CG32640	FALSE
FBgn0032731	Swip-1	FALSE
FBgn0262794	CG43175	UP
FBgn0040629	CAH5	FALSE
FBgn0035859	-	FALSE
FBgn0266208	-	FALSE
FBgn0025634	CG13367	FALSE
FBgn0031500	CG17221	FALSE
FBgn0052945	CG32945	FALSE
FBgn0033206	DCTN4-p62	FALSE
FBgn0034689	CG2921	FALSE
FBgn0036427	CG4613	FALSE
FBgn0264374	-	FALSE
FBgn0265893	-	FALSE
FBgn0263314	CG43400	FALSE
FBgn0015575	alpha-Est7	FALSE
FBgn0013997	Nrx-IV	FALSE
FBgn0030893	RhoGAP16F	FALSE
FBgn0267775	-	FALSE
FBgn0027066	Eb1	FALSE
FBgn0038967	CG13847	FALSE
FBgn0266851	-	FALSE
FBgn0263743	CG43668	FALSE
FBgn0266011	lncRNA:CR44784	FALSE
FBgn0266725	-	FALSE
FBgn0040653	IM4	UP
FBgn0039434	TwdlM	UP
FBgn0058470	CG40470	FALSE
FBgn0000075	amd	FALSE
FBgn0031080	CG12655	FALSE
FBgn0031003	CG7889	FALSE
FBgn0051921	CG31921	FALSE
FBgn0051007	CG31007	FALSE
FBgn0038558	CG12347	FALSE
FBgn0267811	asRNA:CR46136	FALSE
FBgn0283426	-	FALSE
FBgn0036959	CG6951	FALSE
FBgn0267141	-	FALSE
FBgn0264514	-	FALSE
FBgn0267126	-	FALSE
FBgn0265898	-	-
FBgn0033486	dmpd	FALSE
FBgn0052189	-	FALSE
FBgn0032692	IFT46	FALSE
FBgn0265190	PIG-S	FALSE
FBgn0039469	TwdlC	FALSE
FBgn0083949	side-III	FALSE
FBgn0030985	Obp18a	FALSE
FBgn0028932	CG16890	FALSE
FBgn0003071	Pfk	FALSE
FBgn0039994	conu	FALSE
FBgn0032664	Slc25A46b	FALSE
FBgn0036952	CG6933	FALSE
FBgn0051473	CG31473	FALSE
FBgn0034158	CG5522	FALSE
FBgn0025469	slv	FALSE
FBgn0036819	Dysb	FALSE
FBgn0000247	ca	FALSE
FBgn0266916	Cenp-C	FALSE
FBgn0003357	Jon99Ciii	FALSE
FBgn0031711	CG6907	FALSE
FBgn0264474	-	FALSE
FBgn0052150	meru	FALSE
FBgn0052479	Usp10	FALSE
FBgn0038919	Qsox2	FALSE
FBgn0039108	CG10232	UP
FBgn0286916	-	-
FBgn0264294	Cyt-b5	FALSE
FBgn0039915	Gat	FALSE
FBgn0261290	CheA84a	FALSE
FBgn0261522	-	FALSE
FBgn0036795	CG18233	FALSE
FBgn0034420	CG10737	FALSE
FBgn0037114	Cpr78E	FALSE
FBgn0011674	insc	FALSE
FBgn0038157	CG12538	FALSE
FBgn0261794	kcc	FALSE
FBgn0264722	-	FALSE
FBgn0023095	caps	FALSE
FBgn0264504	asRNA:CR43903	-
FBgn0029664	CG10802	FALSE
FBgn0267238	-	FALSE
FBgn0036467	CG12310	FALSE
FBgn0259952	Sfp24Bb	-
FBgn0033601	Cpr47Ed	FALSE
FBgn0040319	Gclc	FALSE
FBgn0031702	fusl	FALSE
FBgn0040056	CG17698	FALSE
FBgn0038551	Odj	FALSE
FBgn0025628	CG4199	FALSE
FBgn0053639	CG33639	FALSE
FBgn0263607	l(3)72Dp	FALSE
FBgn0030622	CG9101	FALSE
FBgn0027108	Inx2	FALSE
FBgn0040900	CG17777	FALSE
FBgn0259230	lectin-22C	FALSE
FBgn0035839	CG7550	FALSE
FBgn0267490	Mst77Y-4	FALSE
FBgn0061196	CG15468	FALSE
FBgn0266322	asRNA:CR44987	FALSE
FBgn0083940	RhoU	FALSE
FBgn0265701	-	FALSE
FBgn0265150	-	-
FBgn0034839	CG13540	FALSE
FBgn0267004	-	FALSE
FBgn0039929	CG11076	FALSE
FBgn0022029	l(2)k01209	FALSE
FBgn0032601	yellow-b	FALSE
FBgn0039742	CG15528	FALSE
FBgn0039900	Syt7	FALSE
FBgn0037792	TAF1B	FALSE
FBgn0031908	CG5177	FALSE
FBgn0267773	asRNA:CR46104	FALSE
FBgn0259933	CG42456	-
FBgn0037340	CG14671	FALSE
FBgn0010926	l(3)07882	FALSE
FBgn0004045	Yp1	FALSE
FBgn0037082	CG5664	FALSE
FBgn0030189	CG2909	FALSE
FBgn0037634	hng2	FALSE
FBgn0016038	Vsp37A	FALSE
FBgn0032922	Coq3	FALSE
FBgn0058172	-	FALSE
FBgn0036727	SecCl	FALSE
FBgn0052835	-	FALSE
FBgn0035751	CG14829	FALSE
FBgn0015520	nonA-l	FALSE
FBgn0034617	Panx	FALSE
FBgn0026417	Hus1-like	FALSE
FBgn0266364	CG45012	-
FBgn0263086	CG43354	-
FBgn0033864	CG18368	FALSE
FBgn0027587	CG7028	FALSE
FBgn0011993	-	-
FBgn0038915	CG17819	FALSE
FBgn0086605	CG9853	FALSE
FBgn0034501	CG13868	FALSE
FBgn0037315	Cerk	FALSE
FBgn0001301	kel	FALSE
FBgn0030104	CG15368	FALSE
FBgn0030745	CG4239	FALSE
FBgn0250834	CG33308	FALSE
FBgn0033212	LRR	FALSE
FBgn0053883	His4:CG33883	-
FBgn0260996	CG42597	FALSE
FBgn0035122	mRpL17	FALSE
FBgn0036527	CG7304	-
FBgn0261444	CG3638	FALSE
FBgn0266878	-	FALSE
FBgn0265735	-	-
FBgn0039260	Smg6	FALSE
FBgn0034713	CG11291	FALSE
FBgn0040531	CG11741	FALSE
FBgn0038879	-	-
FBgn0029873	CG3918	FALSE
FBgn0086690	Plp	FALSE
FBgn0017418	ari-1	FALSE
FBgn0264892	asRNA:CR44083	FALSE
FBgn0260991	Incenp	FALSE
FBgn0261059	Sfp78E	FALSE
FBgn0030098	CG12057	FALSE
FBgn0265257	CG44271	FALSE
FBgn0287616	asRNA:CR46485	FALSE
FBgn0037976	Tk	FALSE
FBgn0267967	corolla	FALSE
FBgn0034791	EMC8-9	FALSE
FBgn0016031	lama	FALSE
FBgn0265049	-	FALSE
FBgn0036394	-	FALSE
FBgn0264385	-	FALSE
FBgn0035473	mge	FALSE
FBgn0085423	GramD1B	FALSE
FBgn0053125	CG33125	FALSE
FBgn0029647	CG17959	FALSE
FBgn0030687	RpIIIC160	FALSE
FBgn0001179	hay	FALSE
FBgn0028525	c(2)M	FALSE
FBgn0032430	CG6388	FALSE
FBgn0035498	Fit1	FALSE
FBgn0262102	CG42855	FALSE
FBgn0029686	Glos	FALSE
FBgn0267821	da	FALSE
FBgn0036495	CG33259	FALSE
FBgn0028412	Mst33A	FALSE
FBgn0030234	CG15211	FALSE
FBgn0038475	Keap1	FALSE
FBgn0036111	Aps	FALSE
FBgn0263247	CG43390	-
FBgn0030480	Tim9a	FALSE
FBgn0030719	eIF5	FALSE
FBgn0028507	CG3793	FALSE
FBgn0032597	CG17904	FALSE
FBgn0039156	CG6178	FALSE
FBgn0039765	mRpS18C	FALSE
FBgn0052085	CG32085	FALSE
FBgn0045477	Gr64c	-
FBgn0264678	-	FALSE
FBgn0035985	Cpr67B	FALSE
FBgn0036676	CG13028	FALSE
FBgn0036581	MED10	FALSE
FBgn0038763	PIG-L	FALSE
FBgn0265986	-	FALSE
FBgn0040973	CG16824	FALSE
FBgn0051015	PH4alphaPV	FALSE
FBgn0004367	mei-41	FALSE
FBgn0035025	uri	FALSE
FBgn0267465	asRNA:CR45815	FALSE
FBgn0262737	mub	FALSE
FBgn0030913	CG6123	FALSE
FBgn0053243	Ste:CG33243	-
FBgn0038890	CG7956	FALSE
FBgn0035268	CG8001	FALSE
FBgn0037552	CG7800	FALSE
FBgn0033375	CG8078	FALSE
FBgn0034842	Prosbeta5R1	FALSE
FBgn0027493	AdSS	FALSE
FBgn0033349	CG8243	FALSE
FBgn0010278	Ssrp	FALSE
FBgn0267558	-	FALSE
FBgn0035298	SCOT	FALSE
FBgn0000422	Ddc	DOWN
FBgn0266219	-	FALSE
FBgn0036188	CG7339	FALSE
FBgn0031389	CG4259	FALSE
FBgn0038849	CG7079	FALSE
FBgn0030946	CG6659	FALSE
FBgn0038870	Oga	FALSE
FBgn0259245	DIP-beta	FALSE
FBgn0013692	-	-
FBgn0286932	CG46429	-
FBgn0034288	CG5084	FALSE
FBgn0050076	CG30076	FALSE
FBgn0036306	CG10973	FALSE
FBgn0031722	CG14011	FALSE
FBgn0010109	dpn	FALSE
FBgn0038143	CG9813	FALSE
FBgn0033238	azot	FALSE
FBgn0265535	CG44385	FALSE
FBgn0028743	Dhit	FALSE
FBgn0050058	CG30058	-
FBgn0037227	TwdlV	FALSE
FBgn0053889	His4:CG33889	-
FBgn0033139	Tsp42Er	FALSE
FBgn0031571	bark	FALSE
FBgn0036896	wnd	FALSE
FBgn0265668	CG44475	FALSE
FBgn0039810	CG15549	FALSE
FBgn0030409	CG15728	FALSE
FBgn0037027	HIPP1	FALSE
FBgn0262680	-	FALSE
FBgn0003139	PpV	FALSE
FBgn0034709	Swim	FALSE
FBgn0051802	CG31802	FALSE
FBgn0262001	CG42819	FALSE
FBgn0000094	Anp	-
FBgn0030724	Nipsnap	FALSE
FBgn0036873	CG18294	-
FBgn0004381	Klp68D	FALSE
FBgn0064227	Rdh	FALSE
FBgn0266029	-	-
FBgn0035583	CG13704	FALSE
FBgn0267738	asRNA:CR46069	-
FBgn0036340	Srrm1	FALSE
FBgn0033715	CG8490	FALSE
FBgn0031693	Cyp4ac1	FALSE
FBgn0267756	-	-
FBgn0052311	zormin	FALSE
FBgn0019660	-	FALSE
FBgn0265929	-	FALSE
FBgn0031462	CG2964	FALSE
FBgn0035960	CG4942	FALSE
FBgn0036470	EAChm	FALSE
FBgn0001092	Gapdh2	FALSE
FBgn0045038	Proc	FALSE
FBgn0041605	cpx	FALSE
FBgn0039732	CG15525	FALSE
FBgn0038608	WRNexo	FALSE
FBgn0034925	CG5339	FALSE
FBgn0039402	Vps2	FALSE
FBgn0011211	blw	UP
FBgn0266811	-	FALSE
FBgn0259108	futsch	FALSE
FBgn0034804	CG3831	FALSE
FBgn0031026	CG12231	FALSE
FBgn0266223	-	FALSE
FBgn0265272	CG30060	FALSE
FBgn0259703	CG42357	FALSE
FBgn0283501	-	FALSE
FBgn0011951	-	-
FBgn0264338	-	FALSE
FBgn0027784	Prp18	FALSE
FBgn0028841	jhamt	FALSE
FBgn0266260	-	FALSE
FBgn0051789	CG31789	FALSE
FBgn0283535	Vha26	FALSE
FBgn0039145	CG6000	FALSE
FBgn0267679	-	FALSE
FBgn0043043	Desat2	FALSE
FBgn0038705	CG11626	FALSE
FBgn0000524	dx	FALSE
FBgn0034626	CG10795	FALSE
FBgn0038938	CG7084	FALSE
FBgn0036704	CG6497	FALSE
FBgn0267754	-	FALSE
FBgn0040849	Ir41a	FALSE
FBgn0266814	-	FALSE
FBgn0011280	Obp19d	FALSE
FBgn0033021	CG10417	FALSE
FBgn0053355	-	-
FBgn0259996	-	-
FBgn0264788	-	FALSE
FBgn0005778	PpD5	FALSE
FBgn0262976	lawc	FALSE
FBgn0266743	-	FALSE
FBgn0038773	CG10887	FALSE
FBgn0037835	CG14687	FALSE
FBgn0267611	-	FALSE
FBgn0024921	Tnpo	FALSE
FBgn0025821	I-t	FALSE
FBgn0261612	CngA	FALSE
FBgn0037099	CG7173	FALSE
FBgn0026634	Cog2	FALSE
FBgn0040763	CG18336	FALSE
FBgn0051683	CG31683	FALSE
FBgn0027864	Ogg1	FALSE
FBgn0031267	Ipk2	FALSE
FBgn0259226	CG42326	FALSE
FBgn0267322	-	FALSE
FBgn0028953	CG14478	FALSE
FBgn0029717	CG12684	FALSE
FBgn0052512	CG32512	FALSE
FBgn0039612	Nepl19	FALSE
FBgn0285948	RpL27A	FALSE
FBgn0040283	SMC1	FALSE
FBgn0037406	Osi1	-
FBgn0032153	CG4537	FALSE
FBgn0265903	-	FALSE
FBgn0038797	Dic2	FALSE
FBgn0038977	CG5376	FALSE
FBgn0265593	-	FALSE
FBgn0022343	CG3760	FALSE
FBgn0052227	gogo	FALSE
FBgn0267565	-	FALSE
FBgn0038118	timeout	FALSE
FBgn0053771	CG33771	FALSE
FBgn0035427	ckd	FALSE
FBgn0000037	mAChR-A	FALSE
FBgn0040850	CG15210	FALSE
FBgn0031313	CG5080	FALSE
FBgn0038235	CG8461	FALSE
FBgn0000173	ben	FALSE
FBgn0265451	asRNA:CR44351	-
FBgn0050293	Cht12	FALSE
FBgn0085474	CG34445	FALSE
FBgn0037687	CG8132	FALSE
FBgn0263048	Gpdh3	FALSE
FBgn0053862	His2A:CG33862	FALSE
FBgn0024277	trio	FALSE
FBgn0267959	-	FALSE
FBgn0265586	-	FALSE
FBgn0027083	MetRS-m	FALSE
FBgn0265765	-	FALSE
FBgn0023213	eIF4G1	FALSE
FBgn0002563	Lsp1beta	FALSE
FBgn0051245	CG31245	FALSE
FBgn0034437	CG10051	FALSE
FBgn0039588	mIF2	FALSE
FBgn0284413	-	FALSE
FBgn0052191	CG32191	FALSE
FBgn0011861	-	-
FBgn0285959	-	-
FBgn0025700	CG5885	FALSE
FBgn0030466	CG15744	FALSE
FBgn0004655	wapl	FALSE
FBgn0027329	CCT6	FALSE
FBgn0264707	RhoGEF3	FALSE
FBgn0266619	asRNA:CR45126	FALSE
FBgn0052718	CG32718	FALSE
FBgn0053299	CG33299	FALSE
FBgn0014029	2-Sep	FALSE
FBgn0034849	CG3500	FALSE
FBgn0261111	BHD	FALSE
FBgn0053865	His2A:CG33865	FALSE
FBgn0016126	CaMKI	FALSE
FBgn0036262	CG6910	UP
FBgn0030347	CG15739	FALSE
FBgn0027793	CG14787	FALSE
FBgn0267767	-	-
FBgn0053269	CG33269	FALSE
FBgn0010894	sinu	FALSE
FBgn0030460	Coq5	FALSE
FBgn0022338	dnk	FALSE
FBgn0263411	-	-
FBgn0053736	-	-
FBgn0051437	CG31437	FALSE
FBgn0032870	CG2608	FALSE
FBgn0035482	CG14985	FALSE
FBgn0259736	CG42390	FALSE
FBgn0260634	eIF4G2	FALSE
FBgn0035231	Pcyt2	FALSE
FBgn0267605	asRNA:CR45943	-
FBgn0051869	CG31869	FALSE
FBgn0284082	-	FALSE
FBgn0266053	Patr-1	FALSE
FBgn0015477	Rme-8	FALSE
FBgn0031856	CG11322	FALSE
FBgn0085380	CG34351	FALSE
FBgn0030786	mRpL22	FALSE
FBgn0033440	CG10459	FALSE
FBgn0039938	Sox102F	FALSE
FBgn0264700	-	-
FBgn0028436	ECSIT	FALSE
FBgn0040236	c11.1	FALSE
FBgn0020378	Sp1	DOWN
FBgn0037163	laza	FALSE
FBgn0053900	His2B:CG33900	-
FBgn0265163	-	-
FBgn0261567	CG42681	FALSE
FBgn0035153	ebd1	FALSE
FBgn0035861	CG7213	FALSE
FBgn0031707	CG14020	FALSE
FBgn0286036	-	-
FBgn0283469	Vps4	FALSE
FBgn0015527	peng	FALSE
FBgn0029914	CG4558	FALSE
FBgn0267682	asRNA:CR46018	-
FBgn0034933	CG3735	FALSE
FBgn0034567	CG15651	FALSE
FBgn0024807	DIP1	FALSE
FBgn0263973	jv	FALSE
FBgn0265578	CG44405	FALSE
FBgn0266797	-	-
FBgn0265652	-	-
FBgn0036597	CG4962	FALSE
FBgn0267017	-	FALSE
FBgn0265640	-	FALSE
FBgn0024841	Pcd	FALSE
FBgn0264696	CG43965	-
FBgn0031749	CG14000	FALSE
FBgn0267300	-	-
FBgn0016797	fz2	FALSE
FBgn0264384	lncRNA:CR43836	FALSE
FBgn0030884	CG6847	FALSE
FBgn0283471	wupA	FALSE
FBgn0031335	CG5565	FALSE
FBgn0260390	CG42516	-
FBgn0265338	-	FALSE
FBgn0052647	CG32647	DOWN
FBgn0011703	RnrL	FALSE
FBgn0032419	CG17217	FALSE
FBgn0033089	CG17266	FALSE
FBgn0052240	CG32240	FALSE
FBgn0287594	CG46463	-
FBgn0261885	osa	FALSE
FBgn0265749	-	FALSE
FBgn0036996	mag	FALSE
FBgn0042101	CG18744	FALSE
FBgn0266884	-	FALSE
FBgn0267695	-	FALSE
FBgn0038463	CG3534	FALSE
FBgn0030330	Tango10	FALSE
FBgn0045485	Gr36c	FALSE
FBgn0035636	Cralbp	FALSE
FBgn0033474	CG1407	FALSE
FBgn0050412	CG30412	FALSE
FBgn0031623	Taf12L	FALSE
FBgn0004870	bab1	FALSE
FBgn0034527	CG9945	FALSE
FBgn0266279	-	FALSE
FBgn0050438	Ugt50B3	FALSE
FBgn0039617	DIP-gamma	FALSE
FBgn0034136	DAT	FALSE
FBgn0035415	CG14966	FALSE
FBgn0261383	IntS6	FALSE
FBgn0028429	I-2	FALSE
FBgn0019938	RpI1	FALSE
FBgn0035851	MED24	FALSE
FBgn0030921	CG6290	-
FBgn0086683	Spf45	FALSE
FBgn0054021	CG34021	FALSE
FBgn0266953	-	FALSE
FBgn0038981	CG5346	FALSE
FBgn0002905	DNApol-theta	FALSE
FBgn0004619	GluRIA	FALSE
FBgn0052214	CG32214	FALSE
FBgn0264961	asRNA:CR44130	FALSE
FBgn0052129	-	-
FBgn0038744	CG4733	UP
FBgn0085195	-	FALSE
FBgn0032224	Sps2	FALSE
FBgn0266849	-	FALSE
FBgn0025391	Scgdelta	UP
FBgn0013691	-	-
FBgn0036518	RhoGAP71E	FALSE
FBgn0037972	CG10005	FALSE
FBgn0034723	CG13506	FALSE
FBgn0004101	bs	FALSE
FBgn0037853	CG14696	FALSE
FBgn0035934	TrpA1	FALSE
FBgn0028864	CG18477	FALSE
FBgn0040660	CG13551	FALSE
FBgn0010292	bys	FALSE
FBgn0050009	-	FALSE
FBgn0052320	CG32320	FALSE
FBgn0051928	CG31928	FALSE
FBgn0039846	PNPase	FALSE
FBgn0011592	fra	FALSE
FBgn0034242	CG14480	-
FBgn0036224	Rpt4R	FALSE
FBgn0042187	CG17234	-
FBgn0051570	-	-
FBgn0026379	Pten	FALSE
FBgn0034120	CG15710	FALSE
FBgn0004397	Vinc	FALSE
FBgn0039136	CG5902	FALSE
FBgn0001189	hfw	FALSE
FBgn0283525	l(2)10685	FALSE
FBgn0004237	Hrb87F	FALSE
FBgn0266005	-	FALSE
FBgn0031301	CG14339	FALSE
FBgn0264394	asRNA:CR43842	FALSE
FBgn0032899	CG9338	FALSE
FBgn0052383	sphinx1	FALSE
FBgn0011966	-	FALSE
FBgn0053443	-	-
FBgn0286786	hoip	FALSE
FBgn0267086	-	FALSE
FBgn0031600	CG3652	FALSE
FBgn0038641	ChT	FALSE
FBgn0014455	Ahcy	FALSE
FBgn0085506	CG40635	FALSE
FBgn0050108	CG30108	FALSE
FBgn0035205	Ctr9	FALSE
FBgn0038160	CG9759	FALSE
FBgn0003386	Shaw	FALSE
FBgn0083991	CG34155	FALSE
FBgn0026876	CG11403	FALSE
FBgn0031596	CG15429	FALSE
FBgn0265657	-	-
FBgn0265445	-	-
FBgn0031546	CG8851	FALSE
FBgn0032724	CG10428	FALSE
FBgn0032935	Atg18b	FALSE
FBgn0043471	kappaTry	FALSE
FBgn0034856	yellow-d2	FALSE
FBgn0039385	CG5913	FALSE
FBgn0004593	Eig71Ef	FALSE
FBgn0086350	tef	FALSE
FBgn0037305	CG12173	FALSE
FBgn0051871	CG31871	FALSE
FBgn0266180	-	FALSE
FBgn0037801	CG3999	FALSE
FBgn0040324	Ephrin	FALSE
FBgn0010309	pigeon	FALSE
FBgn0031374	Wdr62	FALSE
FBgn0032312	CG14071	FALSE
FBgn0003435	sm	FALSE
FBgn0035089	Phk-3	FALSE
FBgn0262631	lncRNA:CR43148	FALSE
FBgn0000536	eas	FALSE
FBgn0265381	-	FALSE
FBgn0032067	LManIV	FALSE
FBgn0027546	CG4766	FALSE
FBgn0053240	Ste:CG33240	-
FBgn0051320	HEATR2	FALSE
FBgn0033363	CG13744	UP
FBgn0264431	-	FALSE
FBgn0030666	CG12708	FALSE
FBgn0262538	CG43092	FALSE
FBgn0040514	CG17169	FALSE
FBgn0265343	-	FALSE
FBgn0038731	CG11659	UP
FBgn0261850	Xpd	FALSE
FBgn0032253	LManI	FALSE
FBgn0259795	loopin-1	FALSE
FBgn0034825	Gpdh2	FALSE
FBgn0033500	CG12913	FALSE
FBgn0067905	IM14	UP
FBgn0015222	Fer1HCH	FALSE
FBgn0011715	Snr1	FALSE
FBgn0284246	l(2)k09848	FALSE
FBgn0005640	Eip63E	FALSE
FBgn0035890	CG13667	FALSE
FBgn0014868	Ost48	FALSE
FBgn0036093	CG14154	FALSE
FBgn0033848	CG13330	-
FBgn0039058	VhaAC39-2	FALSE
FBgn0267560	-	FALSE
FBgn0038250	CG3505	FALSE
FBgn0010622	DCTN3-p24	FALSE
FBgn0031484	CG3165	FALSE
FBgn0259111	Ndae1	FALSE
FBgn0032337	AstCC	FALSE
FBgn0264462	-	FALSE
FBgn0039622	eIF4E6	FALSE
FBgn0265835	-	FALSE
FBgn0033649	pyr	FALSE
FBgn0086912	mbm	FALSE
FBgn0267927	-	FALSE
FBgn0026261	bonsai	FALSE
FBgn0039342	CG5107	FALSE
FBgn0039495	CG5909	FALSE
FBgn0031763	CG13996	FALSE
FBgn0035414	CG14965	FALSE
FBgn0052133	Ptip	FALSE
FBgn0013751	Awh	FALSE
FBgn0037829	CG14691	FALSE
FBgn0011745	Arp1	FALSE
FBgn0011207	pelo	FALSE
FBgn0266330	asRNA:CR44995	-
FBgn0266148	-	FALSE
FBgn0052071	CG32071	FALSE
FBgn0034988	cN-IIIB	FALSE
FBgn0027528	goe	FALSE
FBgn0036789	AstC-R2	FALSE
FBgn0263270	CG43396	FALSE
FBgn0035077	CG9083	-
FBgn0040754	CG17059	FALSE
FBgn0030844	ppk23	FALSE
FBgn0262029	d	DOWN
FBgn0003517	sta	FALSE
FBgn0259861	Su(Ste):CR42430	FALSE
FBgn0085308	CG34279	FALSE
FBgn0016756	Usp47	FALSE
FBgn0263251	vnc	-
FBgn0085432	pan	FALSE
FBgn0285951	mRpS34	FALSE
FBgn0001138	grn	FALSE
FBgn0001612	Grip91	FALSE
FBgn0001258	Ldh	FALSE
FBgn0029816	CG12729	FALSE
FBgn0051077	CG31077	FALSE
FBgn0286892	-	FALSE
FBgn0043530	Obp51a	FALSE
FBgn0031585	CG2955	FALSE
FBgn0263278	Fic	FALSE
FBgn0033826	CG4734	FALSE
FBgn0011289	TfIIA-L	FALSE
FBgn0265695	-	FALSE
FBgn0051145	CG31145	FALSE
FBgn0264328	asRNA:CR43787	FALSE
FBgn0265976	-	-
FBgn0051760	CG31760	FALSE
FBgn0013749	Arf102F	FALSE
FBgn0039559	NSD	FALSE
FBgn0029755	Sas10	FALSE
FBgn0004597	CycC	FALSE
FBgn0031776	Pfdn1	FALSE
FBgn0267684	asRNA:CR46020	-
FBgn0013305	Nmda1	FALSE
FBgn0260860	Bet5	FALSE
FBgn0035825	CG8111	FALSE
FBgn0030012	CG18262	FALSE
FBgn0085434	NaCP60E	FALSE
FBgn0038268	CG3631	FALSE
FBgn0263118	tx	FALSE
FBgn0033633	Smyd4-3	FALSE
FBgn0260940	lsn	FALSE
FBgn0260660	Mp	FALSE
FBgn0265050	asRNA:CR44165	FALSE
FBgn0003118	pnt	FALSE
FBgn0266837	-	-
FBgn0051354	Hsp70Bbb	FALSE
FBgn0028965	A16	FALSE
FBgn0039349	Ssadh	FALSE
FBgn0259714	DIP-epsilon	FALSE
FBgn0263870	-	FALSE
FBgn0053445	-	-
FBgn0015025	CkIIalpha-i1	FALSE
FBgn0086384	Mer	FALSE
FBgn0037467	Ufl1	FALSE
FBgn0004914	Hnf4	FALSE
FBgn0021814	Vps28	FALSE
FBgn0053513	Nmdar2	FALSE
FBgn0028911	-	-
FBgn0265187	Fatp2	FALSE
FBgn0044048	Ilp5	FALSE
FBgn0032549	CG4650	FALSE
FBgn0039809	CG15547	FALSE
FBgn0037020	Pex14	FALSE
FBgn0036046	Ilp2	FALSE
FBgn0030524	CG10993	FALSE
FBgn0264955	asRNA:CR44124	FALSE
FBgn0063923	Kaz1-ORFB	FALSE
FBgn0036915	Prp3	FALSE
FBgn0039006	Cyp6d4	FALSE
FBgn0031257	CG4133	FALSE
FBgn0286833	-	FALSE
FBgn0039656	CG11951	FALSE
FBgn0266197	-	FALSE
FBgn0267114	-	FALSE
FBgn0011276	HLH3B	FALSE
FBgn0002629	E(spl)m4-BFM	FALSE
FBgn0026084	cib	FALSE
FBgn0033578	BBS4	FALSE
FBgn0033863	CG13337	FALSE
FBgn0000140	asp	FALSE
FBgn0015621	Clp	FALSE
FBgn0034237	eIF3b	FALSE
FBgn0003651	svp	FALSE
FBgn0250817	-	FALSE
FBgn0052023	CG32023	FALSE
FBgn0031696	Bub1	FALSE
FBgn0260955	-	FALSE
FBgn0265589	-	-
FBgn0026378	Rep	FALSE
FBgn0266220	-	FALSE
FBgn0283651	CG46301	FALSE
FBgn0263234	Phae1	FALSE
FBgn0022987	qkr54B	FALSE
FBgn0041624	Or65b	FALSE
FBgn0034957	Rsph4a	FALSE
FBgn0030566	betaNACtes4	FALSE
FBgn0039790	CG2246	FALSE
FBgn0036545	GXIVsPLA2	FALSE
FBgn0027617	CG5808	FALSE
FBgn0266052	-	FALSE
FBgn0265425	-	FALSE
FBgn0034645	ND-B12	FALSE
FBgn0036868	ms(3)76Ba	FALSE
FBgn0029763	Usp16-45	FALSE
FBgn0030025	CG2147	FALSE
FBgn0263441	asRNA:CR43464	FALSE
FBgn0035865	CG7201	FALSE
FBgn0038247	Cad88C	FALSE
FBgn0263326	CG43407	-
FBgn0265883	-	FALSE
FBgn0051333	-	FALSE
FBgn0039754	CG9747	FALSE
FBgn0051088	CG31088	-
FBgn0264000	GluRIB	FALSE
FBgn0035164	CG13901	FALSE
FBgn0259969	Sfp65A	FALSE
FBgn0266405	-	FALSE
FBgn0032476	CG5439	FALSE
FBgn0266116	-	FALSE
FBgn0053849	His1:CG33849	-
FBgn0267247	-	FALSE
FBgn0265546	-	FALSE
FBgn0034909	CG4797	FALSE
FBgn0037162	CG11449	FALSE
FBgn0266351	asRNA:CR45000	FALSE
FBgn0017482	T3dh	FALSE
FBgn0263289	scrib	FALSE
FBgn0030457	CG12096	FALSE
FBgn0000182	BicC	FALSE
FBgn0265149	-	FALSE
FBgn0283658	muc	FALSE
FBgn0266800	-	-
FBgn0039029	CG4704	FALSE
FBgn0030512	Nadsyn	FALSE
FBgn0039300	RpS27	FALSE
FBgn0052202	CG32202	FALSE
FBgn0031820	Daxx	FALSE
FBgn0261984	Ire1	FALSE
FBgn0065100	-	FALSE
FBgn0034774	CG13526	FALSE
FBgn0035359	CG1143	FALSE
FBgn0046301	CG7148	FALSE
FBgn0033160	Dhx15	FALSE
FBgn0265302	asRNA:CR44275	-
FBgn0037517	CG10086	FALSE
FBgn0266685	asRNA:CR45175	-
FBgn0264943	-	FALSE
FBgn0041233	Gr59e	FALSE
FBgn0267590	-	FALSE
FBgn0041723	rho-5	FALSE
FBgn0031037	CG14207	FALSE
FBgn0034869	CG13558	FALSE
FBgn0261787	brun	FALSE
FBgn0264435	-	FALSE
FBgn0024188	san	FALSE
FBgn0035665	Jon65Aiii	FALSE
FBgn0036298	nst	FALSE
FBgn0033294	Mal-A4	FALSE
FBgn0035949	CG13314	FALSE
FBgn0037174	CG14457	FALSE
FBgn0041096	rols	FALSE
FBgn0011871	-	-
FBgn0261363	PPO3	UP
FBgn0053534	-	-
FBgn0030900	Him	FALSE
FBgn0265374	-	FALSE
FBgn0267059	-	FALSE
FBgn0004556	Dbp73D	FALSE
FBgn0051776	CG31776	FALSE
FBgn0030880	CG6788	UP
FBgn0036405	CG6833	FALSE
FBgn0038829	CG17271	FALSE
FBgn0053099	CG33099	FALSE
FBgn0263769	-	-
FBgn0263495	-	FALSE
FBgn0036416	CG7924	DOWN
FBgn0266316	asRNA:CR44981	FALSE
FBgn0039647	jus	FALSE
FBgn0265097	-	-
FBgn0267182	-	FALSE
FBgn0085582	-	FALSE
FBgn0263030	CG43325	-
FBgn0267137	-	FALSE
FBgn0003701	thr	FALSE
FBgn0031317	Charon	FALSE
FBgn0266773	-	FALSE
FBgn0039200	CG13616	FALSE
FBgn0029113	Uba2	FALSE
FBgn0037766	Teh1	FALSE
FBgn0039114	Lsd-1	FALSE
FBgn0032752	CG10702	FALSE
FBgn0264739	CG43997	FALSE
FBgn0040253	Ugt35E1	FALSE
FBgn0028893	CG31819	FALSE
FBgn0085425	CG34396	FALSE
FBgn0000492	Dr	FALSE
FBgn0031021	ND-18	FALSE
FBgn0036153	CG7573	FALSE
FBgn0020304	drongo	FALSE
FBgn0265838	-	FALSE
FBgn0263037	CG43332	-
FBgn0264896	asRNA:CR44087	-
FBgn0028688	Rpn7	FALSE
FBgn0040801	CG13053	FALSE
FBgn0050288	CG30288	FALSE
FBgn0033155	Br140	FALSE
FBgn0035848	Uxs	FALSE
FBgn0263598	Vha68-2	FALSE
FBgn0265806	-	FALSE
FBgn0037926	Elp1	FALSE
FBgn0267561	-	FALSE
FBgn0267314	-	FALSE
FBgn0032873	CG2614	FALSE
FBgn0038353	CG5399	FALSE
FBgn0038504	Sur-8	FALSE
FBgn0031478	CG8814	FALSE
FBgn0036684	CG3764	FALSE
FBgn0085443	spri	FALSE
FBgn0039015	Takl2	FALSE
FBgn0024273	WASp	FALSE
FBgn0032824	CG13962	DOWN
FBgn0051633	CG31633	FALSE
FBgn0011902	-	-
FBgn0053641	CG33641	FALSE
FBgn0020641	Lcp65Ad	FALSE
FBgn0039336	CG4553	FALSE
FBgn0026630	nes	FALSE
FBgn0032246	Wdfy2	FALSE
FBgn0261808	cu	FALSE
FBgn0035789	mthl6	DOWN
FBgn0051183	CG31183	FALSE
FBgn0267215	-	-
FBgn0265636	-	FALSE
FBgn0086655	jing	FALSE
FBgn0285970	CG32500	-
FBgn0265960	-	FALSE
FBgn0266654	asRNA:CR45161	-
FBgn0038795	CG4335	FALSE
FBgn0034093	CG15706	FALSE
FBgn0053894	His2B:CG33894	-
FBgn0267365	l(2)SH0834	FALSE
FBgn0051220	CG31220	UP
FBgn0267448	asRNA:CR45798	FALSE
FBgn0085287	CG34258	FALSE
FBgn0259704	Nsun5	FALSE
FBgn0259214	PMCA	FALSE
FBgn0266829	-	FALSE
FBgn0035138	CG13884	FALSE
FBgn0027343	fz3	FALSE
FBgn0026722	drosha	FALSE
FBgn0287215	-	FALSE
FBgn0029725	CG2871	FALSE
FBgn0013563	Pex1	FALSE
FBgn0261988	Gprk2	FALSE
FBgn0033734	CG8520	FALSE
FBgn0031883	Caper	FALSE
FBgn0261802	CG42748	FALSE
FBgn0052820	CG32820	FALSE
FBgn0037481	MAGE	FALSE
FBgn0031323	CG5139	FALSE
FBgn0014343	mirr	FALSE
FBgn0264790	asRNA:CR44020	FALSE
FBgn0266432	CG45062	FALSE
FBgn0034479	CG8654	FALSE
FBgn0052357	-	-
FBgn0027552	CG10863	FALSE
FBgn0267162	-	FALSE
FBgn0262982	CG43290	FALSE
FBgn0035627	Sse	FALSE
FBgn0259977	Tdc1	FALSE
FBgn0261860	CG42789	-
FBgn0000320	eya	FALSE
FBgn0038839	Ktl	FALSE
FBgn0029501	Crtp	FALSE
FBgn0262968	-	FALSE
FBgn0029508	Tsp42Ea	FALSE
FBgn0031424	VGlut	FALSE
FBgn0038126	CG8483	FALSE
FBgn0026238	gus	FALSE
FBgn0037619	CG8159	FALSE
FBgn0043575	PGRP-SC2	FALSE
FBgn0050103	CG30103	FALSE
FBgn0051613	His3:CG31613	-
FBgn0266720	Snap24	FALSE
FBgn0262148	-	FALSE
FBgn0013700	-	-
FBgn0033067	CG11211	-
FBgn0002466	sti	FALSE
FBgn0050251	-	-
FBgn0259859	Su(Ste):CR42428	FALSE
FBgn0034504	CG8929	FALSE
FBgn0033584	CG7737	UP
FBgn0259193	Ir94d	FALSE
FBgn0266047	CG44812	FALSE
FBgn0029881	pigs	FALSE
FBgn0038676	CG6026	FALSE
FBgn0035906	GstO2	UP
FBgn0264358	-	FALSE
FBgn0265638	-	FALSE
FBgn0037102	CRIF	FALSE
FBgn0050467	CG30467	FALSE
FBgn0052105	Lmx1a	FALSE
FBgn0032536	Ance-3	FALSE
FBgn0266991	-	-
FBgn0051698	CG31698	FALSE
FBgn0020388	Gcn5	FALSE
FBgn0031247	CG11562	FALSE
FBgn0000500	Dsk	FALSE
FBgn0266145	-	FALSE
FBgn0033872	CG6329	FALSE
FBgn0267990	-	FALSE
FBgn0032553	CG4480	FALSE
FBgn0053398	-	-
FBgn0054056	CG34056	FALSE
FBgn0025724	beta'COP	FALSE
FBgn0264740	CG43998	-
FBgn0025639	Hmt4-20	FALSE
FBgn0004859	ci	FALSE
FBgn0267440	-	FALSE
FBgn0265854	-	FALSE
FBgn0053376	-	-
FBgn0262881	CG43236	DOWN
FBgn0283494	Adk2	-
FBgn0287587	CG46457	FALSE
FBgn0033186	CG1602	FALSE
FBgn0033028	hrm	FALSE
FBgn0011836	Taf2	FALSE
FBgn0052986	CG32986	-
FBgn0031452	Cwc25	FALSE
FBgn0267728	otk2	FALSE
FBgn0261238	Alh	FALSE
FBgn0050095	CG30095	FALSE
FBgn0065098	-	DOWN
FBgn0265075	-	FALSE
FBgn0034821	CG9876	FALSE
FBgn0034580	Cht8	FALSE
FBgn0267548	-	FALSE
FBgn0039626	Slu7	FALSE
FBgn0037421	CG15594	FALSE
FBgn0051453	pch2	DOWN
FBgn0000594	Est-P	-
FBgn0263802	-	FALSE
FBgn0034939	thoc5	FALSE
FBgn0051213	CG31213	FALSE
FBgn0039779	PH4alphaSG2	FALSE
FBgn0004053	zen	-
FBgn0037677	CG12951	FALSE
FBgn0033844	bbc	FALSE
FBgn0027082	ProRS-m	FALSE
FBgn0039215	CG6695	FALSE
FBgn0029940	CG1958	FALSE
FBgn0000115	Arl1	FALSE
FBgn0011296	l(2)efl	FALSE
FBgn0026088	CG14818	FALSE
FBgn0028484	Ack	FALSE
FBgn0286041	-	FALSE
FBgn0033274	CG14757	FALSE
FBgn0266896	-	-
FBgn0002773	Mlc2	FALSE
FBgn0028941	CG16853	FALSE
FBgn0029789	PGAP1	FALSE
FBgn0284257	Ttd14	FALSE
FBgn0284436	CCT8	FALSE
FBgn0038186	CG14362	FALSE
FBgn0010359	gammaTry	FALSE
FBgn0037578	CG9601	FALSE
FBgn0039590	CG10011	FALSE
FBgn0266858	-	-
FBgn0267473	-	FALSE
FBgn0040475	SH3PX1	FALSE
FBgn0038211	CG9649	FALSE
FBgn0031107	HERC2	FALSE
FBgn0027532	CG7139	FALSE
FBgn0250832	Dup99B	FALSE
FBgn0032803	CG13082	FALSE
FBgn0264841	asRNA:CR44049	-
FBgn0020497	emb	FALSE
FBgn0036975	CG5618	FALSE
FBgn0034025	Pgant1	FALSE
FBgn0039042	CG13837	FALSE
FBgn0265199	CG44259	FALSE
FBgn0039470	CG6296	FALSE
FBgn0286222	Fum1	FALSE
FBgn0038151	yellow-e2	FALSE
FBgn0267060	-	-
FBgn0052656	Muc11A	UP
FBgn0032964	CG11630	FALSE
FBgn0020508	Ag5r2	FALSE
FBgn0037399	Or83c	FALSE
FBgn0023537	CG17896	FALSE
FBgn0033602	Cpr47Ee	FALSE
FBgn0051997	CG31997	FALSE
FBgn0085408	Shrm	FALSE
FBgn0265064	-	FALSE
FBgn0026386	Or47a	FALSE
FBgn0052195	CG32195	FALSE
FBgn0037040	CG12983	FALSE
FBgn0259143	CG42258	FALSE
FBgn0052119	CG32119	FALSE
FBgn0051797	CG31797	FALSE
FBgn0264704	-	FALSE
FBgn0263871	-	FALSE
FBgn0046687	Tre1	FALSE
FBgn0001087	g	FALSE
FBgn0263589	asRNA:CR43614	FALSE
FBgn0034936	Stoml2	FALSE
FBgn0027093	ArgRS	FALSE
FBgn0261843	pre-mod(mdg4)-W	-
FBgn0037218	aux	FALSE
FBgn0037778	mtTFB2	FALSE
FBgn0033339	Sec31	FALSE
FBgn0031240	CG3345	FALSE
FBgn0005695	gcl	FALSE
FBgn0086357	Sec61alpha	FALSE
FBgn0267230	-	FALSE
FBgn0002573	sens	FALSE
FBgn0036761	MED19	FALSE
FBgn0259237	CG42335	FALSE
FBgn0013683	ND4L	FALSE
FBgn0053855	His1:CG33855	-
FBgn0266252	-	FALSE
FBgn0038473	Ns1	FALSE
FBgn0051849	CG31849	FALSE
FBgn0266965	-	FALSE
FBgn0040794	CG13056	FALSE
FBgn0263612	-	FALSE
FBgn0266442	CG45072	FALSE
FBgn0085343	Sws1	-
FBgn0000057	adp	FALSE
FBgn0033981	Cyp6a21	FALSE
FBgn0260401	MED9	-
FBgn0029807	CG3108	FALSE
FBgn0034032	CG8195	FALSE
FBgn0264905	-	FALSE
FBgn0035332	CG13801	FALSE
FBgn0035551	CG7465	FALSE
FBgn0052461	CG32461	FALSE
FBgn0030228	BTBD9	FALSE
FBgn0030483	CG12725	FALSE
FBgn0263095	-	FALSE
FBgn0031364	CG17648	FALSE
FBgn0031520	CG8837	FALSE
FBgn0037963	Cad87A	FALSE
FBgn0003654	sw	FALSE
FBgn0033767	CG13148	FALSE
FBgn0036986	CG5282	FALSE
FBgn0003353	sei	FALSE
FBgn0086785	Vps36	FALSE
FBgn0267037	asRNA:CR45481	FALSE
FBgn0036024	CG18180	FALSE
FBgn0029836	CG5928	FALSE
FBgn0032123	Oatp30B	FALSE
FBgn0029989	CG15333	FALSE
FBgn0266167	-	FALSE
FBgn0036844	Mkp3	FALSE
FBgn0050120	CG30120	-
FBgn0262123	l(2)41Ab	FALSE
FBgn0015838	Vang	FALSE
FBgn0036826	arx	FALSE
FBgn0030196	Psf3	FALSE
FBgn0039421	CG6036	FALSE
FBgn0053434	-	-
FBgn0034068	casp	FALSE
FBgn0267285	-	FALSE
FBgn0033129	Tsp42Eh	FALSE
FBgn0038360	CG9590	FALSE
FBgn0034528	CG11180	FALSE
FBgn0029702	CG15572	FALSE
FBgn0010333	Rac1	FALSE
FBgn0262516	Trpml	FALSE
FBgn0260006	drd	FALSE
FBgn0085461	CG34432	FALSE
FBgn0264710	asRNA:CR43979	-
FBgn0027598	cindr	FALSE
FBgn0036080	Or67d	FALSE
FBgn0010412	RpS19a	FALSE
FBgn0030623	PPYR1	FALSE
FBgn0038300	Mau2	FALSE
FBgn0023097	bon	FALSE
FBgn0033794	CG13326	FALSE
FBgn0040529	COX7A	FALSE
FBgn0031282	Pex12	FALSE
FBgn0085220	Ufm1	FALSE
FBgn0038324	CG5038	FALSE
FBgn0038449	CG17562	FALSE
FBgn0030997	CG7990	FALSE
FBgn0003285	rst	FALSE
FBgn0032702	CG10376	FALSE
FBgn0034942	CG13566	FALSE
FBgn0030710	CG8924	FALSE
FBgn0005596	yem	FALSE
FBgn0267264	-	FALSE
FBgn0037734	trbd	FALSE
FBgn0052039	CG32039	FALSE
FBgn0038540	CG14321	FALSE
FBgn0032900	CG14401	FALSE
FBgn0028567	robl62A	FALSE
FBgn0013675	COX2	FALSE
FBgn0035686	Cpr65Az	FALSE
FBgn0267475	-	FALSE
FBgn0010113	hdc	FALSE
FBgn0001987	Gli	FALSE
FBgn0053432	-	-
FBgn0039065	Rad60	FALSE
FBgn0053542	upd3	FALSE
FBgn0030595	CG14406	DOWN
FBgn0038097	CG14384	FALSE
FBgn0051515	CG31515	FALSE
FBgn0038818	Nep4	FALSE
FBgn0031201	CG12446	FALSE
FBgn0263006	SERCA	UP
FBgn0035021	CG4622	FALSE
FBgn0262893	CG43248	FALSE
FBgn0037502	wa-cup	FALSE
FBgn0020910	RpL3	FALSE
FBgn0038973	Pebp1	FALSE
FBgn0005649	Rox8	FALSE
FBgn0040383	CG5254	FALSE
FBgn0286075	DNAlig3	FALSE
FBgn0035060	Eps-15	FALSE
FBgn0039151	CG13607	FALSE
FBgn0033624	CG12384	FALSE
FBgn0261954	east	FALSE
FBgn0020908	Scp1	FALSE
FBgn0031008	CG8010	FALSE
FBgn0036493	CG7255	FALSE
FBgn0267951	-	-
FBgn0030410	Aven	FALSE
FBgn0261999	Ca-Ma2d	FALSE
FBgn0035064	TyrRS-m	FALSE
FBgn0266459	CG45084	-
FBgn0035146	CG13893	FALSE
FBgn0267585	-	FALSE
FBgn0032394	Hacd1	FALSE
FBgn0034110	Atg9	FALSE
FBgn0266985	-	FALSE
FBgn0039094	CG10184	UP
FBgn0010280	Taf4	FALSE
FBgn0025381	rush	FALSE
FBgn0031066	COX6B	FALSE
FBgn0030263	CG2076	-
FBgn0035256	CG13930	-
FBgn0013348	TpnC41C	FALSE
FBgn0262541	CG43095	FALSE
FBgn0039663	CG2321	FALSE
FBgn0004839	otk	FALSE
FBgn0263050	CG43345	-
FBgn0050360	Mal-A6	FALSE
FBgn0003867	tsl	FALSE
FBgn0286872	-	FALSE
FBgn0053377	-	-
FBgn0261278	grp	FALSE
FBgn0036570	IntS9	FALSE
FBgn0026869	Thd1	FALSE
FBgn0053993	CG33993	FALSE
FBgn0267936	-	FALSE
FBgn0038549	CG17802	FALSE
FBgn0037445	CG9727	FALSE
FBgn0265174	PIG-V	FALSE
FBgn0032147	IP3K1	FALSE
FBgn0286977	Osi10b	FALSE
FBgn0053333	CG33333	FALSE
FBgn0053390	-	-
FBgn0037883	CG14701	FALSE
FBgn0030377	CG1924	FALSE
FBgn0029992	Upf2	FALSE
FBgn0031866	Nlg2	FALSE
FBgn0065092	-	-
FBgn0267621	-	FALSE
FBgn0042710	Hex-t2	FALSE
FBgn0265591	-	FALSE
FBgn0266758	Esyt2	FALSE
FBgn0051249	CG31249	FALSE
FBgn0052702	Cubn	FALSE
FBgn0033900	CysRS-m	FALSE
FBgn0263662	-	FALSE
FBgn0010768	sqz	FALSE
FBgn0024996	eIF2Bbeta	FALSE
FBgn0001341	Mybbp1A	FALSE
FBgn0052163	CG32163	FALSE
FBgn0029175	sotv	FALSE
FBgn0035955	CG5194	FALSE
FBgn0033802	CG17724	FALSE
FBgn0036255	Atg12	FALSE
FBgn0000014	abd-A	FALSE
FBgn0038523	Sgs5bis	DOWN
FBgn0050441	IFT20	FALSE
FBgn0266807	-	FALSE
FBgn0037773	CG5359	FALSE
FBgn0264269	-	-
FBgn0046297	-	FALSE
FBgn0036336	ste14	FALSE
FBgn0032034	Rcd4	FALSE
FBgn0028400	Syt4	FALSE
FBgn0036008	CG3408	FALSE
FBgn0031471	CG3117	FALSE
FBgn0085466	CG34437	FALSE
FBgn0029131	Debcl	FALSE
FBgn0015380	drl	FALSE
FBgn0283439	CG46281	FALSE
FBgn0030703	MSBP	FALSE
FBgn0052857	CG32857	FALSE
FBgn0053404	-	-
FBgn0267667	asRNA:CR46005	FALSE
FBgn0026190	PH4alphaMP	FALSE
FBgn0032850	Kua	FALSE
FBgn0035879	GAPcenA	FALSE
FBgn0052200	-	-
FBgn0031959	spz3	FALSE
FBgn0052099	CG32099	FALSE
FBgn0004779	Ccp84Ae	FALSE
FBgn0267030	lncRNA:CR45474	UP
FBgn0085482	CG34453	FALSE
FBgn0031148	Cbs	FALSE
FBgn0053680	CG33680	FALSE
FBgn0039016	Dcr-1	FALSE
FBgn0004898	fd96Cb	FALSE
FBgn0022959	yps	FALSE
FBgn0038106	CG7488	FALSE
FBgn0000061	al	FALSE
FBgn0031265	CG2794	FALSE
FBgn0010385	Def	FALSE
FBgn0051989	Cap-D3	FALSE
FBgn0039599	intr	-
FBgn0264989	CG44140	FALSE
FBgn0050198	-	-
FBgn0036232	CG14125	FALSE
FBgn0262837	CG43201	-
FBgn0038034	Cyp9f3	FALSE
FBgn0038339	CG6118	FALSE
FBgn0053306	CG33306	FALSE
FBgn0262030	CG42841	FALSE
FBgn0033697	Cyp6t3	FALSE
FBgn0020510	Abi	FALSE
FBgn0053807	His1:CG33807	-
FBgn0030221	Rab9Db	FALSE
FBgn0032329	Art8	FALSE
FBgn0052364	tut	FALSE
FBgn0011581	Ms	FALSE
FBgn0011891	-	FALSE
FBgn0286939	CG46433	-
FBgn0036847	CNPYb	FALSE
FBgn0036369	CG10089	FALSE
FBgn0030066	Uros1	FALSE
FBgn0266846	-	-
FBgn0266311	asRNA:CR44976	-
FBgn0034329	BomS1	UP
FBgn0026077	Gasp	FALSE
FBgn0030367	Cyp311a1	FALSE
FBgn0266679	-	FALSE
FBgn0036741	anchor	FALSE
FBgn0263599	l(3)72Ab	FALSE
FBgn0030817	CG4991	FALSE
FBgn0041240	Gr57a	-
FBgn0028903	CG13243	FALSE
FBgn0030336	CG1578	FALSE
FBgn0038205	Kif19A	FALSE
FBgn0033720	CG13160	FALSE
FBgn0051680	CG31680	-
FBgn0004856	Bx42	FALSE
FBgn0054015	CG34015	FALSE
FBgn0032499	Uvrag	FALSE
FBgn0286203	stw	UP
FBgn0054010	Glyat	FALSE
FBgn0038627	CG7694	FALSE
FBgn0264750	CG44008	FALSE
FBgn0011666	msi	FALSE
FBgn0031191	Cp110	FALSE
FBgn0036662	CG9706	FALSE
FBgn0040797	-	FALSE
FBgn0264674	-	FALSE
FBgn0031836	CG11050	FALSE
FBgn0051538	CG31538	FALSE
FBgn0025643	CG3588	FALSE
FBgn0267028	-	DOWN
FBgn0033301	CG12780	FALSE
FBgn0014870	Psi	FALSE
FBgn0036924	hale	FALSE
FBgn0261702	asRNA:CR42738	FALSE
FBgn0263032	CG43327	-
FBgn0011336	Stt3B	FALSE
FBgn0052285	-	-
FBgn0037714	CG9396	FALSE
FBgn0038244	CG7987	FALSE
FBgn0004577	Pxd	FALSE
FBgn0031059	CG14229	FALSE
FBgn0260874	Ir76a	FALSE
FBgn0030966	shop	FALSE
FBgn0036437	CG5048	FALSE
FBgn0267104	CG45544	FALSE
FBgn0028738	ETH	-
FBgn0267744	-	FALSE
FBgn0262359	CG43057	FALSE
FBgn0266632	-	-
FBgn0039561	mfrn	FALSE
FBgn0050277	Oatp58Da	FALSE
FBgn0039577	CG12516	FALSE
FBgn0037949	prd1	FALSE
FBgn0037626	CG8236	FALSE
FBgn0066114	GlcAT-I	FALSE
FBgn0001967	NimC3	-
FBgn0033518	Prx2540-2	UP
FBgn0243516	Vrp1	FALSE
FBgn0053017	CG33017	FALSE
FBgn0038376	Hmt-1	FALSE
FBgn0032798	CG10132	FALSE
FBgn0051708	DIP-zeta	FALSE
FBgn0037755	CG12945	FALSE
FBgn0284220	Top2	FALSE
FBgn0037846	CG6574	FALSE
FBgn0285926	Imp	FALSE
FBgn0032144	CG17633	FALSE
FBgn0039522	CG13972	-
FBgn0262736	Vha16-1	FALSE
FBgn0038921	Theg	FALSE
FBgn0031937	CG13795	FALSE
FBgn0028562	sut2	FALSE
FBgn0024491	Bin1	FALSE
FBgn0032415	rho-6	FALSE
FBgn0000808	gd	FALSE
FBgn0052029	Cpr66D	FALSE
FBgn0035644	DNApol-epsilon58	FALSE
FBgn0039735	Nph	FALSE
FBgn0033297	Mal-A8	FALSE
FBgn0034480	CG16898	FALSE
FBgn0032481	CG16972	FALSE
FBgn0264438	-	-
FBgn0053868	His2B:CG33868	FALSE
FBgn0004167	kst	FALSE
FBgn0051781	-	FALSE
FBgn0260775	DnaJ-60	-
FBgn0037826	CG14689	FALSE
FBgn0031512	CG15404	DOWN
FBgn0035033	CG3548	FALSE
FBgn0051495	CG31495	FALSE
FBgn0022238	lolal	UP
FBgn0035872	Cpsf6	FALSE
FBgn0037802	Sirt6	FALSE
FBgn0259162	RunxB	FALSE
FBgn0035196	CG9129	FALSE
FBgn0000451	ect	FALSE
FBgn0025681	CG3558	FALSE
FBgn0266645	asRNA:CR45152	-
FBgn0043455	CG5986	FALSE
FBgn0085231	CG34202	FALSE
FBgn0035802	Pura	FALSE
FBgn0267528	asRNA:CR45868	FALSE
FBgn0039002	CG17625	FALSE
FBgn0033250	CG14762	UP
FBgn0032057	CG9287	FALSE
FBgn0001086	fzy	FALSE
FBgn0039970	CG17508	FALSE
FBgn0051206	CG31206	FALSE
FBgn0030091	CG7065	FALSE
FBgn0032231	CG5056	FALSE
FBgn0266680	-	FALSE
FBgn0000227	Bsg25A	-
FBgn0032535	Ance-2	FALSE
FBgn0266855	-	FALSE
FBgn0040569	-	-
FBgn0034734	CG4554	FALSE
FBgn0030058	CG11294	FALSE
FBgn0032090	CG9582	FALSE
FBgn0267145	-	FALSE
FBgn0264507	asRNA:CR43906	FALSE
FBgn0010638	Sec61beta	FALSE
FBgn0083936	Acp54A1	-
FBgn0039532	Mtl	FALSE
FBgn0259984	kuz	FALSE
FBgn0037723	SpdS	FALSE
FBgn0032371	CG4983	FALSE
FBgn0263398	Uck	FALSE
FBgn0259685	crb	FALSE
FBgn0260486	Ziz	FALSE
FBgn0085322	CG34293	FALSE
FBgn0264883	-	FALSE
FBgn0266382	asRNA:CR45024	-
FBgn0263387	CG43439	-
FBgn0263492	asRNA:CR43481	FALSE
FBgn0065095	-	-
FBgn0001285	Jon44E	FALSE
FBgn0040392	CG14050	FALSE
FBgn0264371	-	FALSE
FBgn0262813	CG43184	FALSE
FBgn0032688	CG15160	FALSE
FBgn0051860	ZnT33D	FALSE
FBgn0038017	CG4115	FALSE
FBgn0033110	CG9447	FALSE
FBgn0267299	-	-
FBgn0011259	Sema1a	FALSE
FBgn0001296	kar	FALSE
FBgn0264298	CG43776	-
FBgn0036486	Msh6	FALSE
FBgn0013433	beat-Ia	FALSE
FBgn0036768	CG7402	FALSE
FBgn0263994	CG43737	FALSE
FBgn0265044	-	FALSE
FBgn0036889	CG14100	FALSE
FBgn0032524	Hacd2	FALSE
FBgn0052480	-	FALSE
FBgn0037428	Osi18	FALSE
FBgn0011850	-	-
FBgn0035763	mrva	FALSE
FBgn0042118	Cpr65Ax2	UP
FBgn0032643	GCS2beta	FALSE
FBgn0265948	-	FALSE
FBgn0046706	Haspin	FALSE
FBgn0036620	CG4842	FALSE
FBgn0003969	vap	FALSE
FBgn0259846	-	FALSE
FBgn0259722	CG42376	FALSE
FBgn0015031	cype	FALSE
FBgn0037911	CG10898	FALSE
FBgn0036318	Wbp2	FALSE
FBgn0039354	Lgr3	FALSE
FBgn0266897	-	-
FBgn0035094	CG9380	FALSE
FBgn0261822	Bsg	FALSE
FBgn0262854	CG43218	FALSE
FBgn0011481	Ssdp	FALSE
FBgn0039250	Mink	FALSE
FBgn0264617	-	FALSE
FBgn0038303	SIDL	FALSE
FBgn0002945	nkd	FALSE
FBgn0267133	-	FALSE
FBgn0052230	ND-MLRQ	FALSE
FBgn0038195	CG3061	FALSE
FBgn0050031	CG30031	FALSE
FBgn0054005	CG34005	FALSE
FBgn0035134	CG1231	FALSE
FBgn0029522	CG13373	FALSE
FBgn0005771	noc	FALSE
FBgn0266537	-	FALSE
FBgn0265413	CG44325	FALSE
FBgn0034197	Cda9	FALSE
FBgn0020261	pcm	FALSE
FBgn0012017	-	FALSE
FBgn0085223	CG34194	FALSE
FBgn0029152	Mkrn1	FALSE
FBgn0262486	CG43076	FALSE
FBgn0031232	CG11617	FALSE
FBgn0264368	asRNA:CR43820	FALSE
FBgn0039257	tnc	FALSE
FBgn0036451	Helz	FALSE
FBgn0003130	Poxn	FALSE
FBgn0263930	dally	FALSE
FBgn0052040	CG32040	FALSE
FBgn0029961	Ir7a	FALSE
FBgn0013704	-	-
FBgn0031905	gudu	FALSE
FBgn0037351	RpL13A	FALSE
FBgn0028858	CG10839	FALSE
FBgn0031413	CG9967	FALSE
FBgn0264343	CG43799	UP
FBgn0260968	CG42591	FALSE
FBgn0287720	-	FALSE
FBgn0063498	GstE2	FALSE
FBgn0035720	CG10077	FALSE
FBgn0261262	CG42613	FALSE
FBgn0011893	-	-
FBgn0032671	JMJD4	FALSE
FBgn0039644	rdog	FALSE
FBgn0266392	-	DOWN
FBgn0034283	CG14492	FALSE
FBgn0023527	CG3071	FALSE
FBgn0021872	Xbp1	FALSE
FBgn0031042	CG14221	FALSE
FBgn0050431	CG30431	FALSE
FBgn0032836	CG10680	FALSE
FBgn0263980	Stacl	FALSE
FBgn0051021	CG31021	FALSE
FBgn0063368	Gpb5	FALSE
FBgn0036181	Muc68Ca	UP
FBgn0259922	Skadu	FALSE
FBgn0000577	en	FALSE
FBgn0034961	CG3163	FALSE
FBgn0029943	Atg5	FALSE
FBgn0020369	Rpt6	FALSE
FBgn0031969	pes	FALSE
FBgn0036970	Spn77Bc	FALSE
FBgn0263256	CG43394	FALSE
FBgn0267988	-	FALSE
FBgn0050043	CG30043	FALSE
FBgn0263626	-	FALSE
FBgn0266707	-	-
FBgn0032013	Scgalpha	FALSE
FBgn0266930	-	FALSE
FBgn0052668	CG32668	FALSE
FBgn0034218	CG18467	FALSE
FBgn0260812	inaF-D	FALSE
FBgn0033498	CG12209	FALSE
FBgn0050110	CG30110	FALSE
FBgn0002534	Lcp3	FALSE
FBgn0085214	CG34185	FALSE
FBgn0067783	DPCoAC	FALSE
FBgn0003205	Ras85D	FALSE
FBgn0035372	CG12093	FALSE
FBgn0267719	-	FALSE
FBgn0086251	del	FALSE
FBgn0030092	fh	FALSE
FBgn0037068	Cpr78Cb	FALSE
FBgn0004362	HmgD	FALSE
FBgn0040554	asRNA:CR17025	-
FBgn0259963	Sfp33A2	FALSE
FBgn0000024	Ace	FALSE
FBgn0011845	-	-
FBgn0043536	Obp57d	-
FBgn0025336	CG4882	FALSE
FBgn0033891	CG8067	FALSE
FBgn0261019	moi	-
FBgn0029681	CG15239	FALSE
FBgn0261291	CheA86a	FALSE
FBgn0036640	nxf2	FALSE
FBgn0030439	CG12716	FALSE
FBgn0261285	Ppcs	FALSE
FBgn0031115	CG11710	FALSE
FBgn0037881	GCC88	FALSE
FBgn0267800	-	FALSE
FBgn0259733	tal-AA	-
FBgn0028516	ZnT35C	FALSE
FBgn0261634	CG42717	FALSE
FBgn0266830	-	FALSE
FBgn0033702	CG8854	FALSE
FBgn0039802	dj-1beta	FALSE
FBgn0010040	GstD4	FALSE
FBgn0038499	Brf	FALSE
FBgn0030964	Pvf1	FALSE
FBgn0052572	CG32572	FALSE
FBgn0038168	omd	FALSE
FBgn0032699	CG10383	FALSE
FBgn0033868	S-Lap7	FALSE
FBgn0283479	Alp1	FALSE
FBgn0053111	CG33111	FALSE
FBgn0010019	Cyp4g1	FALSE
FBgn0085453	Mthfs	DOWN
FBgn0267809	asRNA:CR46134	FALSE
FBgn0037683	CG18473	FALSE
FBgn0032585	Nepl8	FALSE
FBgn0039666	Diedel	FALSE
FBgn0263999	CG43742	FALSE
FBgn0030695	PGRP-LE	FALSE
FBgn0037950	HisCl1	FALSE
FBgn0039088	CG10164	FALSE
FBgn0011722	Tig	FALSE
FBgn0036815	HipHop	FALSE
FBgn0037780	ohgt	FALSE
FBgn0038132	apn	FALSE
FBgn0085312	CG34283	FALSE
FBgn0259878	Fs	FALSE
FBgn0032087	CG9568	FALSE
FBgn0030018	slpr	FALSE
FBgn0286567	gry	FALSE
FBgn0036352	CG14110	FALSE
FBgn0028370	kek3	FALSE
FBgn0034902	CG5532	FALSE
FBgn0025525	bab2	FALSE
FBgn0267746	-	-
FBgn0267304	-	FALSE
FBgn0031284	PGAP2	FALSE
FBgn0000557	eEF1alpha2	FALSE
FBgn0266071	-	FALSE
FBgn0026150	ApepP	FALSE
FBgn0259198	CG42302	FALSE
FBgn0030400	Pits	FALSE
FBgn0036324	CG12520	FALSE
FBgn0015791	Rab14	FALSE
FBgn0031187	Usp2	FALSE
FBgn0027582	CG6230	FALSE
FBgn0031252	CG13690	FALSE
FBgn0266642	asRNA:CR45149	FALSE
FBgn0035176	CG13905	UP
FBgn0053281	CG33281	FALSE
FBgn0033742	Nepl10	FALSE
FBgn0267799	-	FALSE
FBgn0004867	RpS2	FALSE
FBgn0267941	-	FALSE
FBgn0267070	-	FALSE
FBgn0037344	CG2926	FALSE
FBgn0035458	ppk27	FALSE
FBgn0004244	Rdl	FALSE
FBgn0032494	CG5945	FALSE
FBgn0267533	asRNA:CR45873	-
FBgn0011829	Ret	FALSE
FBgn0002962	nos	FALSE
FBgn0031476	CG8813	FALSE
FBgn0002933	ng1	UP
FBgn0087041	CG42231	-
FBgn0035524	CG11583	FALSE
FBgn0265825	-	FALSE
FBgn0037933	Ho	FALSE
FBgn0032514	CG9302	FALSE
FBgn0053234	CG33234	FALSE
FBgn0262109	-	FALSE
FBgn0263867	-	FALSE
FBgn0029667	Gas8	FALSE
FBgn0266698	-	FALSE
FBgn0265683	-	FALSE
FBgn0015777	nrv2	FALSE
FBgn0034143	CG8303	FALSE
FBgn0267922	-	FALSE
FBgn0262886	-	FALSE
FBgn0051793	CG31793	FALSE
FBgn0035462	IntS10	FALSE
FBgn0038957	CG7059	FALSE
FBgn0035210	msd5	FALSE
FBgn0260934	par-1	FALSE
FBgn0035082	CG2811	FALSE
FBgn0264848	vih	FALSE
FBgn0039774	CDase	FALSE
FBgn0051643	CG31643	FALSE
FBgn0265364	-	FALSE
FBgn0028572	qtc	FALSE
FBgn0035057	CG3880	FALSE
FBgn0266247	-	-
FBgn0011980	-	-
FBgn0052483	CG32483	FALSE
FBgn0034330	BomS4	FALSE
FBgn0036925	schuy	FALSE
FBgn0051525	CG31525	FALSE
FBgn0028369	kirre	FALSE
FBgn0032707	CG10348	FALSE
FBgn0035915	S-Lap1	FALSE
FBgn0038723	CG6195	FALSE
FBgn0037906	PGRP-LB	FALSE
FBgn0014010	Rab5	FALSE
FBgn0053460	CG33460	FALSE
FBgn0032880	TM9SF2	FALSE
FBgn0053252	CG33252	FALSE
FBgn0004103	Pp1-87B	FALSE
FBgn0024248	chico	FALSE
FBgn0031052	Elys	FALSE
FBgn0037220	CG14641	FALSE
FBgn0022960	vimar	FALSE
FBgn0262529	CG43083	FALSE
FBgn0046258	CG12880	DOWN
FBgn0264448	asRNA:CR43866	FALSE
FBgn0261723	Dbx	FALSE
FBgn0024994	Ugalt	FALSE
FBgn0010323	Gsc	FALSE
FBgn0030876	CG6762	FALSE
FBgn0021765	scu	FALSE
[truncated: 14,943 more rows]

## Sheet: Table S3
Table S3. The list of 445 DEGs specifically in P vs. non-P
ID	GeneSymbol	expression profile	Log2FoldChange	q-value
FBgn0261363	PPO3	up	5.60302	3.231e-35
FBgn0266253	lncRNA:CR44948	up	5.53448	1.61029e-26
FBgn0042106	CG18754	up	4.88282	2.35543e-26
FBgn0053225	CG33225	up	4.02741	4.14579e-22
FBgn0034005	ItgaPS4	up	4.61246	9.90812e-22
FBgn0040211	hgo	up	3.30812	8.5206e-20
FBgn0262683	CG43153	up	4.45426	1.97188e-19
FBgn0036992	Hpd	up	4.29127	2.84782e-19
FBgn0037386	CG1208	up	3.25013	6.3771e-18
FBgn0000592	Est-6	up	3.60559	6.75108e-18
FBgn0001187	Hex-C	up	3.99599	1.0873e-17
FBgn0040736	BomS3	up	5.08167	8.11477e-17
FBgn0034329	BomS1	up	4.98368	5.87806e-14
FBgn0003886	alphaTub85E	up	2.93936	1.28022e-13
FBgn0040653	IM4	up	9.73344	3.32111e-13
FBgn0033830	CG10814	up	3.61637	6.60876e-12
FBgn0034328	BomBc1	up	7.05804	1.24953e-11
FBgn0038986	sit	up	2.89972	1.21732e-10
FBgn0028573	prc	up	3.43043	3.61307e-10
FBgn0030880	CG6788	up	6.85213	6.2267e-10
FBgn0034011	CG8160	up	2.66085	1.06788e-09
FBgn0016013	Faa	up	2.64257	1.53714e-09
FBgn0046878	Obp83cd	up	2.45884	2.46836e-09
FBgn0262794	CG43175	up	3.06534	6.20965e-09
FBgn0040104	lectin-24A	up	3.53701	1.88442e-08
FBgn0054054	CG34054	up	2.75583	1.57247e-07
FBgn0025583	BomS2	up	4.05083	1.66922e-07
FBgn0053302	Cpr31A	up	2.56523	2.60943e-07
FBgn0035545	CG12607	up	3.4893	4.49353e-07
FBgn0039108	CG10232	up	2.21044	4.63044e-07
FBgn0053117	Victoria	up	7.59414	4.76691e-07
FBgn0265577	-	up	2.76621	4.76691e-07
FBgn0037420	-	up	2.72138	4.82042e-07
FBgn0039780	PH4alphaNE1	up	3.16147	7.14039e-07
FBgn0035582	CG13705	up	3.76151	9.43332e-07
FBgn0052074	CG32074	up	2.91079	1.30563e-06
FBgn0032318	-	up	2.43942	1.56586e-06
FBgn0040734	-	up	5.30595	1.81127e-06
FBgn0030588	CG9521	up	2.41178	2.11728e-06
FBgn0034551	CG15225	up	4.71609	2.7527e-06
FBgn0034880	ItgaPS5	up	2.16304	2.77532e-06
FBgn0028514	CG4793	up	1.99112	3.28147e-06
FBgn0058198	CG40198	up	2.97815	3.60328e-06
FBgn0037140	SLC22A	up	2.08474	3.60328e-06
FBgn0067905	IM14	up	4.9185	3.7916e-06
FBgn0051219	CG31219	up	4.1548	4.57914e-06
FBgn0052564	CG32564	up	2.18636	4.81922e-06
FBgn0039759	CG9733	up	2.50575	9.75012e-06
FBgn0051091	CG31091	up	2.38318	9.75012e-06
FBgn0052248	-	up	2.38516	1.16324e-05
FBgn0036359	CG14105	up	2.52765	1.25407e-05
FBgn0086900	Cpr65Ax1	up	3.65294	1.25407e-05
FBgn0029639	CG14419	up	2.86508	1.45655e-05
FBgn0260763	CG42561	up	2.39398	1.51766e-05
FBgn0052694	CG32694	up	2.42488	1.88445e-05
FBgn0037181	-	up	1.90133	1.96418e-05
FBgn0051220	CG31220	up	3.69612	2.01041e-05
FBgn0053462	CG33462	up	3.16828	2.01469e-05
FBgn0026754	Ugt37C1	up	2.56725	2.28455e-05
FBgn0004782	Ccp84Ab	up	2.16607	2.31051e-05
FBgn0034331	BomBc2	up	3.78395	3.01416e-05
FBgn0033397	-	up	2.4158	3.43004e-05
FBgn0010294	ng2	up	2.11439	4.37121e-05
FBgn0040256	Ugt35C1	up	1.71726	4.37121e-05
FBgn0069056	-	up	2.14928	4.86853e-05
FBgn0039435	TwdlP	up	3.52192	4.86853e-05
FBgn0004783	-	up	2.44809	5.23921e-05
FBgn0041183	Tep1	up	1.59767	7.66812e-05
FBgn0033464	-	up	3.26739	7.72656e-05
FBgn0262003	-	up	2.36232	8.27694e-05
FBgn0085483	CG34454	up	1.75236	0.000107663
FBgn0038130	CG8630	up	1.60874	0.000114521
FBgn0035552	CG11350	up	3.00918	0.000115826
FBgn0033246	ACC	up	1.79629	0.000115826
FBgn0030148	-	up	2.60589	0.000120246
FBgn0037290	CG1124	up	1.77949	0.000125497
FBgn0040582	BomBc3	up	3.78297	0.000131175
FBgn0262607	CG43133	up	1.92586	0.000132846
FBgn0027584	CG4757	up	3.70165	0.000143882
FBgn0014865	Mtk	up	2.74085	0.000148035
FBgn0264343	CG43799	up	2.01114	0.000148035
FBgn0052241	CG32241	up	2.07488	0.000149276
FBgn0036589	-	up	2.34501	0.000151724
FBgn0031940	CG7214	up	2.11584	0.000153876
FBgn0052574	Twdlalpha	up	2.20086	0.000155992
FBgn0037230	Nepl11	up	2.25634	0.000180197
FBgn0039324	CG10553	up	1.70186	0.000210153
FBgn0033703	CG13170	up	4.13203	0.000270715
FBgn0034382	CG18609	up	1.88333	0.00034995
FBgn0039820	-	up	2.46737	0.000376067
FBgn0028544	-	up	2.56911	0.000532273
FBgn0015035	Cyp4e3	up	2.23667	0.000532273
FBgn0287234	-	up	1.92739	0.000633016
FBgn0016075	vkg	up	1.74554	0.000666528
FBgn0037697	GstZ2	up	1.43982	0.000747789
FBgn0036422	-	up	2.36014	0.00076073
FBgn0085455	CG34426	up	2.03352	0.000783256
FBgn0038731	CG11659	up	2.01	0.000823281
FBgn0034204	-	up	2.68029	0.000963684
FBgn0263741	CG43666	up	2.81743	0.000999678
FBgn0030539	-	up	2.00547	0.00123603
FBgn0036181	Muc68Ca	up	1.68425	0.00136945
FBgn0014454	Acp1	up	2.08731	0.0014102
FBgn0050457	-	up	2.47464	0.00145573
FBgn0039805	-	up	1.66829	0.00147529
FBgn0032910	CG9265	up	1.40078	0.00147529
FBgn0035281	Cpr62Bc	up	2.19871	0.00147529
FBgn0030157	CG1468	up	1.64278	0.00147529
FBgn0050026	CG30026	up	7.15992	0.00149255
FBgn0037204	-	up	1.65618	0.00154371
FBgn0032538	Vajk2	up	1.739	0.00154371
FBgn0051769	CG31769	up	1.4863	0.0017216
FBgn0085297	CG34268	up	5.22138	0.00172324
FBgn0013772	Cyp6a8	up	1.36267	0.00177412
FBgn0017448	-	up	1.76789	0.00184228
FBgn0033079	Fmo-2	up	2.01417	0.00197737
FBgn0042118	Cpr65Ax2	up	2.72106	0.00204511
FBgn0260746	Ect3	up	1.25968	0.00221078
FBgn0261955	-	up	1.74207	0.00221078
FBgn0033271	CG8708	up	1.53273	0.00233833
FBgn0053461	-	up	1.96867	0.00235053
FBgn0015032	Cyp4c3	up	1.34591	0.00241499
FBgn0034716	-	up	1.39929	0.00257499
FBgn0039296	Sil1	up	1.3128	0.00258926
FBgn0052603	CG32603	up	2.19685	0.00270362
FBgn0001098	-	up	1.85867	0.00270789
FBgn0036588	-	up	3.69496	0.00277382
FBgn0039798	CG11313	up	1.47397	0.00286407
FBgn0263020	CG43315	up	1.55115	0.00300581
FBgn0053483	CG33483	up	1.86835	0.00321298
FBgn0033728	-	up	1.65098	0.00324699
FBgn0025682	scf	up	1.39377	0.00329802
FBgn0033598	-	up	1.72201	0.00362791
FBgn0036108	-	up	2.03533	0.00384284
FBgn0000299	Col4a1	up	1.51006	0.00420357
FBgn0003888	betaTub60D	up	1.593	0.00431051
FBgn0036157	-	up	2.91444	0.00475606
FBgn0040257	-	up	3.86567	0.00479629
FBgn0037225	-	up	1.74565	0.00482716
FBgn0022238	lolal	up	1.43306	0.00482716
FBgn0034159	CG15615	up	1.62134	0.00511337
FBgn0038930	-	up	2.833	0.0051307
FBgn0265877	CG44666	up	3.65152	0.00617214
FBgn0038148	-	up	5.16319	0.00636343
FBgn0283462	IMPPP	up	4.82221	0.00668825
FBgn0010388	Dro	up	3.14717	0.00672007
FBgn0051454	-	up	1.63385	0.00685793
FBgn0029765	-	up	1.4756	0.00715552
FBgn0030612	CG5599	up	1.76479	0.00718939
FBgn0034605	-	up	1.60329	0.00756341
FBgn0035176	CG13905	up	1.27171	0.00757537
FBgn0039564	Nep7	up	1.48807	0.00757537
FBgn0040588	CG13841	up	3.02887	0.00803897
FBgn0036717	-	up	1.63392	0.00832717
FBgn0010295	-	up	1.5924	0.00837237
FBgn0267243	asRNA:CR45683	up	2.73652	0.00859607
FBgn0002933	ng1	up	2.50737	0.00876438
FBgn0037989	ATP8B	up	1.21495	0.00878289
FBgn0035244	ABCB7	up	1.28089	0.00878289
FBgn0028583	-	up	1.67389	0.00895759
FBgn0034391	CG15080	up	3.40521	0.00897234
FBgn0263742	CG43667	up	4.02602	0.00902474
FBgn0038878	CG3301	up	1.30512	0.00963491
FBgn0051974	CG31974	up	1.91976	0.00965244
FBgn0267798	-	up	6.51629	0.00965244
FBgn0036532	CG13445	up	2.18856	0.00987682
FBgn0030824	-	up	1.51255	0.00991453
FBgn0014368	-	up	1.40181	0.00991453
FBgn0035476	CG12766	up	2.27032	0.0109821
FBgn0039434	TwdlM	up	2.14231	0.0114989
FBgn0036138	CG14143	up	2.20926	0.0117125
FBgn0030575	CG5321	up	1.33598	0.0118928
FBgn0033363	CG13744	up	2.43383	0.0122161
FBgn0063491	GstE9	up	1.70066	0.0123286
FBgn0261575	tobi	up	1.4167	0.0123535
FBgn0038846	CG5697	up	1.53149	0.0123535
FBgn0033355	-	up	2.91551	0.0123535
FBgn0265140	-	up	1.1542	0.0123535
FBgn0040262	Ugt37C2	up	2.11577	0.0126343
FBgn0004034	y	up	2.2975	0.012739
FBgn0036106	CG6409	up	1.1384	0.0128366
FBgn0035104	CG13875	up	1.73045	0.0128909
FBgn0033033	-	up	1.2738	0.012978
FBgn0028482	-	up	1.25953	0.0130185
FBgn0032140	-	up	1.11984	0.0130381
FBgn0036760	CG5567	up	1.3816	0.0131894
FBgn0039438	TwdlO	up	3.42658	0.0132748
FBgn0032282	-	up	1.91056	0.0136989
FBgn0260430	CG42525	up	2.52908	0.0136989
FBgn0052170	CG32170	up	1.50672	0.0138626
FBgn0037503	CG14598	up	1.73178	0.0144142
FBgn0039094	CG10184	up	1.27703	0.0144142
FBgn0040764	CG13230	up	2.78413	0.0144434
FBgn0003089	pip	up	1.33444	0.0149323
FBgn0035906	GstO2	up	1.44172	0.0152207
FBgn0038290	-	up	1.66155	0.0156393
FBgn0033308	CG8736	up	2.34746	0.0163787
FBgn0012051	CalpA	up	1.33054	0.0164473
FBgn0038646	-	up	1.31142	0.016817
FBgn0284248	-	up	1.58328	0.0170049
FBgn0039719	CG15515	up	2.5833	0.0176787
FBgn0031869	-	up	1.23499	0.0177245
FBgn0038405	CG8927	up	1.83987	0.0181011
FBgn0039298	to	up	1.2836	0.0181011
FBgn0039873	Smvt	up	1.32104	0.0182133
FBgn0025837	CG17636	up	1.20622	0.0188015
FBgn0030537	-	up	6.59522	0.0191312
FBgn0040069	-	up	1.36829	0.019249
FBgn0038173	Adgf-C	up	1.36784	0.019249
FBgn0020637	Lcp65Ag2	up	3.15953	0.019249
FBgn0032136	Apoltp	up	1.28944	0.019249
FBgn0086254	-	up	1.42241	0.0193691
FBgn0032886	CG9328	up	1.25935	0.0193719
FBgn0020415	Idgf2	up	1.58456	0.0196299
FBgn0036109	Cpr67Fa2	up	1.93629	0.0197654
FBgn0052198	CG32198	up	2.2314	0.0203914
FBgn0020638	Lcp65Ag1	up	3.22127	0.0203914
FBgn0031703	CG12512	up	1.32427	0.0208095
FBgn0004780	-	up	1.89406	0.0209657
FBgn0051668	CG31668	up	3.90219	0.0211624
FBgn0261258	rgn	up	1.22618	0.021404
FBgn0011211	blw	up	1.56903	0.0224837
FBgn0010395	Itgbn	up	1.14351	0.023341
FBgn0267785	-	up	5.9122	0.0241736
FBgn0030060	CG2004	up	1.14091	0.0247949
FBgn0051832	CG31832	up	1.53686	0.0248135
FBgn0036598	CG4982	up	1.92095	0.0250667
FBgn0085456	-	up	1.63353	0.0251848
FBgn0036742	-	up	1.061	0.0251848
FBgn0026570	CG5704	up	1.77269	0.0261036
FBgn0083972	CG34136	up	1.25643	0.0261036
FBgn0028526	CG15293	up	1.24575	0.0261584
FBgn0033968	hui	up	1.23635	0.0261584
FBgn0267030	lncRNA:CR45474	up	6.23687	0.0261584
FBgn0086519	Cpr47Eg	up	2.28273	0.0261584
FBgn0031942	CG7203	up	1.84701	0.0261584
FBgn0041581	AttB	up	1.68852	0.0261584
FBgn0036607	-	up	2.6522	0.0261584
FBgn0283427	FASN1	up	1.2916	0.0261735
FBgn0052656	Muc11A	up	1.55284	0.0265031
FBgn0039101	CG16710	up	2.77135	0.0274097
FBgn0026755	-	up	1.87145	0.027605
FBgn0051014	PH4alphaSG1	up	1.12124	0.027605
FBgn0030331	CG15221	up	1.33124	0.027605
FBgn0038740	-	up	1.30799	0.027817
FBgn0039441	TwdlN	up	1.68892	0.0280818
FBgn0040091	-	up	1.39793	0.0290154
FBgn0022700	Cht4	up	1.51628	0.0293095
FBgn0037996	-	up	1.40366	0.0295663
FBgn0051973	-	up	1.25854	0.0304627
FBgn0262717	Skeletor	up	1.23868	0.0316468
FBgn0035708	-	up	1.10737	0.0318561
FBgn0266369	-	up	1.19261	0.0323072
FBgn0027610	Dic1	up	1.36194	0.0323455
FBgn0046113	GluRIIC	up	1.28777	0.0325809
FBgn0286203	stw	up	1.06722	0.0325809
FBgn0025391	Scgdelta	up	1.08924	0.0339255
FBgn0039237	CG13640	up	1.86042	0.0343603
FBgn0034718	wdp	up	1.34192	0.0343603
FBgn0033518	Prx2540-2	up	1.56483	0.035513
FBgn0037288	CG14661	up	1.52573	0.0359262
FBgn0063494	-	up	1.39376	0.0359262
FBgn0033874	CG6347	up	3.00758	0.0359262
FBgn0024150	Ac78C	up	1.08279	0.0360305
FBgn0038730	CG6300	up	1.58573	0.0363853
FBgn0062978	CG31808	up	1.05391	0.036402
FBgn0032835	-	up	3.67226	0.0364426
FBgn0036211	CG5946	up	1.2944	0.0370567
FBgn0039325	CG10560	up	1.09012	0.038024
FBgn0011286	RyR	up	1.1983	0.0389738
FBgn0031559	CG3513	up	1.40106	0.0389821
FBgn0051248	CG31248	up	2.86418	0.0389821
FBgn0010549	-	up	1.61632	0.0390784
FBgn0087011	CG41520	up	1.05665	0.0395006
FBgn0086450	su(r)	up	1.33335	0.039623
FBgn0037167	CG11425	up	1.02434	0.039623
FBgn0037715	CG9399	up	1.16672	0.0409298
FBgn0035623	mthl2	up	1.11336	0.042792
FBgn0033524	-	up	1.29788	0.0431725
FBgn0028699	Rh50	up	1.0482	0.0432087
FBgn0033519	-	up	1.50643	0.0433225
FBgn0038257	smp-30	up	1.36935	0.043848
FBgn0051326	CG31326	up	2.56234	0.0440472
FBgn0015766	-	up	1.113	0.0440472
FBgn0034484	CG11044	up	1.56374	0.0440472
FBgn0039801	Npc2h	up	1.64876	0.0440472
FBgn0030482	CG1673	up	1.06295	0.0440599
FBgn0263006	SERCA	up	1.6416	0.0442729
FBgn0034511	GNBP-like3	up	2.60583	0.0454844
FBgn0033250	CG14762	up	1.43224	0.0454844
FBgn0036563	CG13075	up	1.01272	0.0455067
FBgn0034828	-	up	1.91117	0.0457734
FBgn0039223	CG5805	up	1.09492	0.0459899
FBgn0037709	CG8199	up	1.03053	0.0460426
FBgn0036262	CG6910	up	1.19447	0.0461855
FBgn0020640	Lcp65Ae	up	1.99028	0.0463105
FBgn0036043	-	up	1.22002	0.0473805
FBgn0039481	Cpr97Eb	up	1.31754	0.0478968
FBgn0033584	CG7737	up	1.26624	0.048354
FBgn0038744	CG4733	up	1.26943	0.048354
FBgn0266258	-	up	3.11809	0.0485964
FBgn0263260	-	up	1.191	0.0486251
FBgn0002780	-	up	1.39551	0.049998
FBgn0033730	Cpr49Ag	up	1.1245	0.0499987
FBgn0286723	hll	down	-3.69134	5.59974e-13
FBgn0270926	AsnS	down	-2.69683	1.28962e-10
FBgn0036587	CG4950	down	-3.73315	2.51083e-06
FBgn0000639	Fbp1	down	-2.50059	3.60328e-06
FBgn0264376	-	down	-4.23129	6.30792e-06
FBgn0002631	-	down	-3.07928	2.03427e-05
FBgn0030326	CG2444	down	-4.32691	3.4027e-05
FBgn0046876	-	down	-2.55097	5.15577e-05
FBgn0032824	CG13962	down	-1.89195	5.23921e-05
FBgn0046258	CG12880	down	-1.9334	6.72118e-05
FBgn0038530	AttD	down	-2.12611	0.00011018
FBgn0037975	CG3397	down	-1.97975	0.000143882
FBgn0035875	-	down	-2.70934	0.000143882
FBgn0085222	CG34193	down	-7.07776	0.000169346
FBgn0038943	-	down	-3.81438	0.000234757
FBgn0039316	-	down	-1.53149	0.000270715
FBgn0033367	PPO2	down	-1.6394	0.000411488
FBgn0265011	Np	down	-3.48456	0.000532273
FBgn0036417	-	down	-6.50178	0.000532273
FBgn0024294	Spn43Aa	down	-3.43735	0.000715067
FBgn0033936	Achl	down	-5.41675	0.000715067
FBgn0052282	Drsl4	down	-6.28975	0.0010952
FBgn0262881	CG43236	down	-3.57356	0.0014102
FBgn0062412	Ctr1B	down	-1.8404	0.00184228
FBgn0033312	CG8642	down	-2.91583	0.00201981
FBgn0053458	CG33458	down	-3.39706	0.00223741
FBgn0266534	-	down	-2.31709	0.00226974
FBgn0033439	-	down	-2.26569	0.00241499
FBgn0035160	hng3	down	-1.50774	0.00241499
FBgn0085235	CG34206	down	-8.10457	0.00317119
FBgn0003295	ru	down	-2.11908	0.00328202
FBgn0083978	CG17672	down	-1.82752	0.00373706
FBgn0051636	CG31636	down	-1.89708	0.00376133
FBgn0052115	-	down	-1.21875	0.00392132
FBgn0036861	CG14089	down	-2.34786	0.00413486
FBgn0040102	lectin-24Db	down	-1.35021	0.00475606
FBgn0035290	-	down	-1.48542	0.00479629
FBgn0013307	Odc1	down	-1.19238	0.00494329
FBgn0036436	CG4914	down	-1.58288	0.0051307
FBgn0036767	CG16775	down	-1.62212	0.0051307
FBgn0034636	twz	down	-1.5574	0.00515049
FBgn0020378	Sp1	down	-1.2922	0.00555841
FBgn0262112	sro	down	-1.39533	0.0066755
FBgn0053093	CG33093	down	-1.67015	0.00682912
FBgn0065098	-	down	-1.84036	0.00703071
FBgn0040682	CG14664	down	-7.41452	0.00757537
FBgn0036416	CG7924	down	-5.31855	0.00778266
FBgn0038523	Sgs5bis	down	-1.70788	0.00837629
FBgn0034623	CG9822	down	-6.58219	0.00856139
FBgn0051076	CG31076	down	-1.33473	0.00864096
FBgn0003162	Pu	down	-1.85839	0.00876438
FBgn0036822	-	down	-1.66976	0.00900848
FBgn0044050	Ilp3	down	-1.60957	0.00963491
FBgn0267570	-	down	-3.62963	0.0101315
FBgn0038820	CG4000	down	-1.49588	0.0102483
FBgn0036410	CG8100	down	-1.36939	0.0103439
FBgn0085273	CG34244	down	-3.799	0.0109785
FBgn0031907	CG5171	down	-3.22852	0.0118928
FBgn0031747	-	down	-2.06501	0.0118928
FBgn0265422	-	down	-2.02883	0.0136989
FBgn0005638	slbo	down	-5.09663	0.0137332
FBgn0000422	Ddc	down	-2.80636	0.0144142
FBgn0030493	CG15756	down	-2.91605	0.0144434
FBgn0051337	CG31337	down	-1.41827	0.0156393
FBgn0000071	Ama	down	-1.6928	0.0157469
FBgn0030595	CG14406	down	-2.79982	0.0159229
FBgn0264273	Sema2b	down	-1.21851	0.0162116
FBgn0033132	Tsp42Ej	down	-1.40262	0.0167363
FBgn0041194	-	down	-1.24097	0.0169597
FBgn0267982	-	down	-5.79581	0.0170888
FBgn0037396	CG11459	down	-2.99836	0.0177245
FBgn0037665	St2	down	-2.11631	0.0179953
FBgn0046253	CG3502	down	-2.92986	0.0180411
FBgn0034996	-	down	-1.83402	0.0181011
FBgn0000241	bw	down	-2.18802	0.0182133
FBgn0000022	ac	down	-1.64157	0.0187307
FBgn0000153	-	down	-2.53254	0.019249
FBgn0030029	CG15343	down	-1.21362	0.019249
FBgn0267111	-	down	-1.95032	0.0193691
FBgn0261932	CG42798	down	-2.28791	0.0193719
FBgn0267028	-	down	-2.58611	0.0193719
FBgn0032211	CG13138	down	-3.00556	0.0196497
FBgn0052447	CG32447	down	-1.6246	0.0200355
FBgn0039851	mey	down	-1.82176	0.0201959
FBgn0038775	-	down	-1.50533	0.0203914
FBgn0031512	CG15404	down	-1.60491	0.0203914
FBgn0045442	mthl12	down	-4.2728	0.0209657
FBgn0262029	d	down	-1.25015	0.021404
FBgn0265980	-	down	-5.96773	0.0223524
FBgn0038095	-	down	-1.13747	0.0224837
FBgn0263406	-	down	-1.68313	0.0226296
FBgn0264825	-	down	-5.63185	0.0241736
FBgn0039678	Obp99a	down	-1.31304	0.0243894
FBgn0039099	-	down	-1.6766	0.0251295
FBgn0003975	-	down	-1.342	0.0251848
FBgn0011692	pav	down	-1.20917	0.0253857
FBgn0266327	-	down	-2.25034	0.0255692
FBgn0034997	CG3376	down	-1.23287	0.0255692
FBgn0266912	-	down	-3.30996	0.0261036
FBgn0266887	-	down	-1.67714	0.0261036
FBgn0001254	ImpE2	down	-2.63705	0.0261036
FBgn0003377	Sgs7	down	-1.68308	0.0261584
FBgn0262362	CG43060	down	-2.49192	0.0261584
FBgn0041710	yellow-f	down	-1.6508	0.0261584
FBgn0034462	CG15905	down	-2.0733	0.0268268
FBgn0266228	-	down	-4.25872	0.0272701
FBgn0026320	Tom	down	-1.15468	0.0286059
FBgn0030105	CG15369	down	-1.79891	0.0291303
FBgn0052647	CG32647	down	-1.58496	0.0304627
FBgn0260954	-	down	-1.21059	0.0304627
FBgn0032405	firl	down	-1.30304	0.0325809
FBgn0036351	-	down	-2.19195	0.0331307
FBgn0003375	Sgs5	down	-1.42298	0.0335199
FBgn0040367	CG11382	down	-2.0259	0.0339544
FBgn0000527	e	down	-3.25612	0.0343893
FBgn0032945	CG8665	down	-1.16291	0.0356639
FBgn0085487	CG34458	down	-5.79166	0.0356639
FBgn0026268	antdh	down	-1.197	0.0359262
FBgn0260474	-	down	-2.08164	0.0359262
FBgn0026878	-	down	-1.11371	0.0364426
FBgn0031791	AANATL2	down	-1.1756	0.0364426
FBgn0037730	CG9444	down	-1.18815	0.0370567
FBgn0033408	-	down	-1.94085	0.038024
FBgn0051453	pch2	down	-1.06659	0.0389821
FBgn0035806	-	down	-1.09183	0.039623
FBgn0035789	mthl6	down	-1.26753	0.0410926
FBgn0033170	sPLA2	down	-1.02411	0.0414409
FBgn0033809	CG4630	down	-1.10543	0.0415739
FBgn0040606	-	down	-2.11362	0.0433225
FBgn0034785	CG3649	down	-1.81322	0.0440472
FBgn0265686	-	down	-1.76088	0.0454844
FBgn0037553	CG18249	down	-1.03578	0.0460426
FBgn0004588	Eig71Ea	down	-1.9185	0.0471254
FBgn0283437	-	down	-1.11784	0.047843
FBgn0266392	-	down	-2.77285	0.0478968
FBgn0004360	Wnt2	down	-1.24805	0.0478968
FBgn0265510	asRNA:CR44372	down	-5.40595	0.048354
FBgn0035263	CG12035	down	-1.33216	0.0485964
FBgn0001089	Gal	down	-1.23445	0.0485964
FBgn0265740	-	down	-2.66492	0.0485964
FBgn0085453	Mthfs	down	-1.12684	0.0485964

## Sheet: Table S4
Table S4. GO analysis of identified DEGs
Categories	Term	ID	p-value	Upregulate gene number	Downregulate gene number
biological process	chitin-based cuticle development	GO:0040003	1.1e-14	27	0
biological process	cuticle development	GO:0042335	3.6e-13	29	0
biological process	oxidation-reduction process	GO:0055114	3.1e-07	38	0
biological process	body morphogenesis	GO:0010171	2.5e-05	6	0
biological process	aromatic amino acid family metabolic process	GO:0009072	7.9e-05	5	0
biological process	defense response	GO:0006952	0.00068	20	0
biological process	antibacterial humoral response	GO:0019731	0.00079	6	0
biological process	integrin-mediated signaling pathway	GO:0007229	0.00087	3	0
biological process	humoral immune response	GO:0006959	0.00099	10	0
biological process	carboxylic acid metabolic process	GO:0019752	0.00228	17	0
biological process	chitin metabolic process	GO:0006030	0.00229	9	0
biological process	oxoacid metabolic process	GO:0043436	0.00312	17	0
biological process	organic acid metabolic process	GO:0006082	0.0032	17	0
biological process	glutathione metabolic process	GO:0006749	0.00322	5	0
biological process	glucosamine-containing compound metabolic process	GO:1901071	0.00331	9	0
biological process	amino sugar metabolic process	GO:0006040	0.00346	9	0
biological process	cellular modified amino acid metabolic process	GO:0006575	0.00346	6	0
biological process	drug metabolic process	GO:0017144	0.00347	18	0
biological process	oocyte growth	GO:0001555	0.00389	2	0
biological process	pericardium morphogenesis	GO:0003344	0.00389	2	0
biological process	melanin biosynthetic process	GO:0042438	0.00389	2	0
biological process	pericardium development	GO:0060039	0.00389	2	0
biological process	drug catabolic process	GO:0042737	0.00415	5	0
biological process	hemostasis	GO:0007599	0.00527	3	0
biological process	apoptotic cell clearance	GO:0043277	0.00527	3	0
biological process	coagulation	GO:0050817	0.00527	3	0
biological process	tyrosine metabolic process	GO:0006570	0.00575	2	0
biological process	response to bacterium	GO:0009617	0.00658	12	0
biological process	Toll signaling pathway	GO:0008063	0.00756	5	0
biological process	response to sucrose	GO:0009744	0.00822	3	0
biological process	aminoglycan metabolic process	GO:0006022	0.0096	9	0
biological process	cellular amino acid metabolic process	GO:0006520	0.0096	9	0
molecular function	structural constituent of cuticle	GO:0042302	3.1e-19	28	0
molecular function	structural constituent of chitin-based cuticle	GO:0005214	4.5e-17	25	0
molecular function	structural constituent of chitin-based larval cuticle	GO:0008010	8.2e-13	19	0
molecular function	structural molecule activity	GO:0005198	2.2e-11	36	0
molecular function	oxidoreductase activity	GO:0016491	1.4e-06	35	0
molecular function	glucuronosyltransferase activity	GO:0015020	2.3e-05	6	0
molecular function	UDP-glycosyltransferase activity	GO:0008194	0.00073	7	0
molecular function	oxidoreductase activity, acting on paired donors, with incorporation or reduction of molecular oxygen	GO:0016705	0.00088	11	0
molecular function	oxidoreductase activity, acting on single donors with incorporation of molecular oxygen	GO:0016701	0.00102	5	0
molecular function	extracellular matrix structural constituent	GO:0005201	0.00114	4	0
molecular function	catalytic activity	GO:0003824	0.00262	111	0
molecular function	monooxygenase activity	GO:0004497	0.00314	8	0
molecular function	ammonium transmembrane transporter activity	GO:0008519	0.00406	2	0
molecular function	serine-type endopeptidase activity	GO:0004252	0.0043	14	0
molecular function	chitin binding	GO:0008061	0.0049	8	0
molecular function	endopeptidase activity	GO:0004175	0.0066	18	0
molecular function	oxidoreductase activity, acting on single donors with incorporation of molecular oxygen, incorporation of two atoms of oxygen	GO:0016702	0.0068	4	0
molecular function	serine-type peptidase activity	GO:0008236	0.00804	14	0
molecular function	glutathione transferase activity	GO:0004364	0.0082	4	0
molecular function	serine hydrolase activity	GO:0017171	0.00824	14	0
molecular function	transferase activity, transferring hexosyl groups	GO:0016758	0.00831	8	0
molecular function	lipid transporter activity	GO:0005319	0.00873	3	0
molecular function	fatty acid synthase activity	GO:0004312	0.01421	3	0
molecular function	active transmembrane transporter activity	GO:0022804	0.01515	10	0
molecular function	dioxygenase activity	GO:0051213	0.01928	4	0
molecular function	4-hydroxyphenylpyruvate dioxygenase activity	GO:0003868	0.02062	1	0
molecular function	acetyl-CoA carboxylase activity	GO:0003989	0.02062	1	0
molecular function	branched-chain-amino-acid transaminase activity	GO:0004084	0.02062	1	0
molecular function	dihydrolipoamide branched chain acyltransferase activity	GO:0004147	0.02062	1	0
molecular function	fumarylacetoacetase activity	GO:0004334	0.02062	1	0
molecular function	homogentisate 1,2-dioxygenase activity	GO:0004411	0.02062	1	0
molecular function	methylenetetrahydrofolate reductase (NAD(P)H) activity	GO:0004489	0.02062	1	0
molecular function	dopamine beta-monooxygenase activity	GO:0004500	0.02062	1	0
molecular function	ryanodine-sensitive calcium-release channel activity	GO:0005219	0.02062	1	0
molecular function	oxaloacetate transmembrane transporter activity	GO:0015131	0.02062	1	0
molecular function	hydrolase activity, acting on acid carbon-carbon bonds	GO:0016822	0.02062	1	0
molecular function	hydrolase activity, acting on acid carbon-carbon bonds, in ketonic substances	GO:0016823	0.02062	1	0
molecular function	chondroitin sulfotransferase activity	GO:0034481	0.02062	1	0
molecular function	inositol oxygenase activity	GO:0050113	0.02062	1	0
molecular function	L-leucine transaminase activity	GO:0052654	0.02062	1	0
molecular function	L-valine transaminase activity	GO:0052655	0.02062	1	0
molecular function	L-isoleucine transaminase activity	GO:0052656	0.02062	1	0
molecular function	iron ion binding	GO:0005506	0.0243	8	0
molecular function	monosaccharide binding	GO:0048029	0.02639	4	0
molecular function	carbohydrate binding	GO:0030246	0.03125	7	0
molecular function	ATPase activity, coupled to movement of substances	GO:0043492	0.03142	6	0
molecular function	heme binding	GO:0020037	0.0333	7	0
molecular function	transferase activity, transferring glycosyl groups	GO:0016757	0.03359	8	0
molecular function	cofactor binding	GO:0048037	0.03381	15	0
molecular function	transferase activity, transferring alkyl or aryl (other than methyl) groups	GO:0016765	0.03488	4	0
molecular function	tetrapyrrole binding	GO:0046906	0.03544	7	0
molecular function	modified amino acid binding	GO:0072341	0.03724	2	0
molecular function	POZ domain binding	GO:0031208	0.04015	3	0
molecular function	3-methyl-2-oxobutanoate dehydrogenase (2-methylpropanoyl-transferring) activity	GO:0003863	0.04082	1	0
molecular function	citrate (Si)-synthase activity	GO:0004108	0.04082	1	0
molecular function	cytochrome-b5 reductase activity, acting on NAD(P)H	GO:0004128	0.04082	1	0
molecular function	dihydroorotate dehydrogenase activity	GO:0004152	0.04082	1	0
molecular function	glutamate dehydrogenase (NAD+) activity	GO:0004352	0.04082	1	0
molecular function	glutamate dehydrogenase [NAD(P)+] activity	GO:0004353	0.04082	1	0
molecular function	heparan sulfate 2-O-sulfotransferase activity	GO:0004394	0.04082	1	0
molecular function	N,N-dimethylaniline monooxygenase activity	GO:0004499	0.04082	1	0
molecular function	monophenol monooxygenase activity	GO:0004503	0.04082	1	0
molecular function	thiosulfate transmembrane transporter activity	GO:0015117	0.04082	1	0
molecular function	glycoprotein-N-acetylgalactosamine 3-beta-galactosyltransferase activity	GO:0016263	0.04082	1	0
molecular function	oxidoreductase activity, acting on paired donors, with incorporation or reduction of molecular oxygen, another compound as one donor, and incorporation of one a...	GO:0016716	0.04082	1	0
molecular function	dihydrolipoamide S-acyltransferase activity	GO:0030523	0.04082	1	0
molecular function	citrate synthase activity	GO:0036440	0.04082	1	0
molecular function	3-hydroxyoctanoyl-[acyl-carrier-protein] dehydratase activity	GO:0047451	0.04082	1	0
molecular function	cell adhesion mediator activity	GO:0098631	0.04082	1	0
molecular function	cell-cell adhesion mediator activity	GO:0098632	0.04082	1	0
molecular function	peptidase activity, acting on L-amino acid peptides	GO:0070011	0.04556	20	0
cellular component	extracellular region	GO:0005576	1.3e-20	64	0
cellular component	extracellular matrix	GO:0031012	5.8e-16	23	0
cellular component	extracellular region part	GO:0044421	3.2e-14	42	0
cellular component	extracellular space	GO:0005615	0.00018	20	0
cellular component	collagen type IV trimer	GO:0005587	0.0003	2	0
cellular component	network-forming collagen trimer	GO:0098642	0.0003	2	0
cellular component	complex of collagen trimers	GO:0098644	0.0003	2	0
cellular component	collagen network	GO:0098645	0.0003	2	0
cellular component	basement membrane collagen trimer	GO:0098651	0.0003	2	0
cellular component	integrin complex	GO:0008305	0.00057	3	0
cellular component	protein complex involved in cell adhesion	GO:0098636	0.00057	3	0
cellular component	collagen trimer	GO:0005581	0.00089	2	0
cellular component	extracellular matrix component	GO:0044420	0.00089	2	0
cellular component	basement membrane	GO:0005604	0.01233	2	0
cellular component	collagen-containing extracellular matrix	GO:0062023	0.01233	2	0
cellular component	plasma membrane receptor complex	GO:0098802	0.03185	3	0
cellular component	basal plasma membrane	GO:0009925	0.03442	2	0
cellular component	3-methyl-2-oxobutanoate dehydrogenase (lipoamide) complex	GO:0017086	0.03446	1	0
cellular component	supramolecular polymer	GO:0099081	0.04627	8	0
cellular component	supramolecular complex	GO:0099080	0.04927	8	0
biological process	dopamine metabolic process	GO:0042417	4e-06	0	4
biological process	ammonium ion metabolic process	GO:0097164	6.5e-06	0	5
biological process	catecholamine metabolic process	GO:0006584	9.2e-06	0	4
biological process	catechol-containing compound metabolic process	GO:0009712	9.2e-06	0	4
biological process	tyrosine metabolic process	GO:0006570	1e-05	0	3
biological process	developmental pigmentation	GO:0048066	1.2e-05	0	8
biological process	pigmentation	GO:0043473	1.6e-05	0	8
biological process	pigment metabolic process	GO:0042440	2e-05	0	8
biological process	pigment biosynthetic process	GO:0046148	2e-05	0	6
biological process	organic hydroxy compound biosynthetic process	GO:1901617	2.5e-05	0	5
biological process	chitin-based cuticle sclerotization	GO:0007593	5.7e-05	0	5
biological process	defense response to Gram-positive bacterium	GO:0050830	5.7e-05	0	5
biological process	cuticle pigmentation	GO:0048067	6.3e-05	0	5
biological process	molting cycle, chitin-based cuticle	GO:0007591	6.4e-05	0	7
biological process	molting cycle	GO:0042303	6.4e-05	0	7
biological process	phenol-containing compound biosynthetic process	GO:0046189	8.4e-05	0	3
biological process	organic hydroxy compound metabolic process	GO:1901615	0.0003	0	7
biological process	molting cycle process	GO:0022404	0.00034	0	5
biological process	melanin biosynthetic process from tyrosine	GO:0006583	0.0004	0	2
biological process	response to biotic stimulus	GO:0009607	0.00049	0	11
biological process	response to external biotic stimulus	GO:0043207	0.00049	0	11
biological process	response to other organism	GO:0051707	0.00049	0	11
biological process	adult chitin-containing cuticle pigmentation	GO:0048085	0.00053	0	4
biological process	indole-containing compound biosynthetic process	GO:0042435	0.00065	0	2
biological process	melanin biosynthetic process	GO:0042438	0.00065	0	2
biological process	tetrahydrofolate metabolic process	GO:0046653	0.00065	0	2
biological process	phenol-containing compound metabolic process	GO:0018958	0.00072	0	5
biological process	aromatic amino acid family metabolic process	GO:0009072	0.00084	0	3
biological process	nucleobase metabolic process	GO:0009112	0.00084	0	3
biological process	cellular biogenic amine metabolic process	GO:0006576	0.00095	0	3
biological process	purine nucleobase biosynthetic process	GO:0009113	0.00098	0	2
biological process	neurotransmitter metabolic process	GO:0042133	0.00135	0	3
biological process	secondary metabolic process	GO:0019748	0.00141	0	5
biological process	amine metabolic process	GO:0009308	0.00151	0	3
biological process	cellular amine metabolic process	GO:0044106	0.00151	0	3
biological process	cuticle development	GO:0042335	0.00218	0	8
biological process	'de novo' IMP biosynthetic process	GO:0006189	0.00231	0	2
biological process	folic acid-containing compound metabolic process	GO:0006760	0.00231	0	2
biological process	secondary metabolite biosynthetic process	GO:0044550	0.00243	0	3
biological process	proximal/distal pattern formation, imaginal disc	GO:0007449	0.00265	0	3
biological process	melanin metabolic process	GO:0006582	0.0027	0	4
biological process	defense response to fungus	GO:0050832	0.0027	0	4
biological process	defense response to bacterium	GO:0042742	0.00281	0	7
biological process	purine nucleobase metabolic process	GO:0006144	0.00287	0	2
biological process	IMP biosynthetic process	GO:0006188	0.00287	0	2
biological process	IMP metabolic process	GO:0046040	0.00287	0	2
biological process	sensory organ boundary specification	GO:0008052	0.00289	0	3
biological process	defense response to other organism	GO:0098542	0.00352	0	8
biological process	sleep	GO:0030431	0.00355	0	6
biological process	proximal/distal pattern formation	GO:0009954	0.00423	0	3
biological process	leg disc development	GO:0035218	0.00466	0	5
biological process	dorsal/ventral lineage restriction, imaginal disc	GO:0007451	0.0049	0	2
biological process	response to bacterium	GO:0009617	0.00549	0	7
biological process	neurotransmitter biosynthetic process	GO:0042136	0.00568	0	2
biological process	regulation of response to biotic stimulus	GO:0002831	0.00583	0	4
biological process	response to fungus	GO:0009620	0.00583	0	4
biological process	indole-containing compound metabolic process	GO:0042430	0.00652	0	2
biological process	establishment of planar polarity	GO:0001736	0.00709	0	5
biological process	establishment of tissue polarity	GO:0007164	0.00709	0	5
biological process	response to external stimulus	GO:0009605	0.00772	0	17
biological process	humoral immune response	GO:0006959	0.00814	0	5
biological process	alpha-amino acid metabolic process	GO:1901605	0.00819	0	4
biological process	uracil catabolic process	GO:0006212	0.00821	0	1
biological process	dopamine biosynthetic process from tyrosine	GO:0006585	0.00821	0	1
biological process	serotonin biosynthetic process from tryptophan	GO:0006587	0.00821	0	1
biological process	10-formyltetrahydrofolate catabolic process	GO:0009258	0.00821	0	1
biological process	folic acid-containing compound catabolic process	GO:0009397	0.00821	0	1
biological process	beta-alanine metabolic process	GO:0019482	0.00821	0	1
biological process	beta-alanine biosynthetic process	GO:0019483	0.00821	0	1
biological process	uracil metabolic process	GO:0019860	0.00821	0	1
biological process	pteridine-containing compound catabolic process	GO:0042560	0.00821	0	1
biological process	amino acid activation for nonribosomal peptide biosynthetic process	GO:0043041	0.00821	0	1
biological process	amino acid adenylylation by nonribosomal peptide synthase	GO:0043042	0.00821	0	1
biological process	tetrahydrofolate biosynthetic process	GO:0046654	0.00821	0	1
biological process	regulation of melanin biosynthetic process	GO:0048021	0.00821	0	1
biological process	negative regulation of melanin biosynthetic process	GO:0048022	0.00821	0	1
biological process	regulation of secondary metabolite biosynthetic process	GO:1900376	0.00821	0	1
biological process	negative regulation of secondary metabolite biosynthetic process	GO:1900377	0.00821	0	1
biological process	microtubule bundle formation involved in mitotic spindle midzone assembly	GO:1903562	0.00821	0	1
biological process	nucleobase biosynthetic process	GO:0046112	0.00836	0	2
biological process	regulation of adult chitin-containing cuticle pigmentation	GO:0048082	0.00836	0	2
biological process	regulation of response to external stimulus	GO:0032101	0.00836	0	5
biological process	regulation of chitin-based cuticle tanning	GO:0007564	0.00935	0	2
biological process	pteridine-containing compound metabolic process	GO:0042558	0.0104	0	2
biological process	compound eye cone cell fate commitment	GO:0042676	0.0104	0	2
biological process	morphogenesis of a polarized epithelium	GO:0001738	0.01081	0	5
biological process	oxidation-reduction process	GO:0055114	0.0113	0	13
biological process	imaginal disc lineage restriction	GO:0035161	0.01149	0	2
biological process	regulation of cuticle pigmentation	GO:0048079	0.01149	0	2
biological process	regulation of antimicrobial peptide production	GO:0002784	0.01245	0	3
biological process	imaginal disc-derived leg morphogenesis	GO:0007480	0.01261	0	4
biological process	regulation of production of molecular mediator of immune response	GO:0002700	0.01303	0	3
biological process	antimicrobial peptide production	GO:0002775	0.01303	0	3
biological process	axon extension	GO:0048675	0.01303	0	3
biological process	antimicrobial humoral immune response mediated by antimicrobial peptide	GO:0061844	0.01303	0	3
biological process	leg disc morphogenesis	GO:0007478	0.0134	0	4
biological process	production of molecular mediator of immune response	GO:0002440	0.01363	0	3
biological process	neuron projection extension	GO:1990138	0.01424	0	3
biological process	carboxylic acid metabolic process	GO:0019752	0.0144	0	8
biological process	formation of animal organ boundary	GO:0010160	0.01486	0	3
biological process	cellular amino acid metabolic process	GO:0006520	0.01502	0	5
biological process	chaeta morphogenesis	GO:0008407	0.0155	0	3
biological process	G protein-coupled receptor signaling pathway	GO:0007186	0.01575	0	6
biological process	peripheral nervous system development	GO:0007422	0.01596	0	4
biological process	histamine metabolic process	GO:0001692	0.01635	0	1
biological process	pyrimidine nucleobase catabolic process	GO:0006208	0.01635	0	1
biological process	asparagine biosynthetic process	GO:0006529	0.01635	0	1
biological process	coenzyme catabolic process	GO:0009109	0.01635	0	1
biological process	10-formyltetrahydrofolate metabolic process	GO:0009256	0.01635	0	1
biological process	response to high light intensity	GO:0009644	0.01635	0	1
biological process	regulation of GTP cyclohydrolase I activity	GO:0043095	0.01635	0	1
biological process	imidazole-containing compound metabolic process	GO:0052803	0.01635	0	1
biological process	cellular response to high light intensity	GO:0071486	0.01635	0	1
biological process	plus-end-directed vesicle transport along microtubule	GO:0072383	0.01635	0	1
biological process	plus-end-directed organelle transport along microtubule	GO:0072386	0.01635	0	1
biological process	regulation of antimicrobial humoral response	GO:0002759	0.01683	0	3
biological process	oxoacid metabolic process	GO:0043436	0.017	0	8
biological process	organic acid metabolic process	GO:0006082	0.01723	0	8
biological process	regulation of humoral immune response	GO:0002920	0.01822	0	3
biological process	antimicrobial humoral response	GO:0019730	0.0188	0	4
biological process	chaeta development	GO:0022416	0.01982	0	4
biological process	leg disc proximal/distal pattern formation	GO:0007479	0.02045	0	2
biological process	proteolysis	GO:0006508	0.02144	0	14
biological process	dendrite guidance	GO:0070983	0.02191	0	2
biological process	regulation of immune effector process	GO:0002697	0.02196	0	3
biological process	larval chitin-based cuticle development	GO:0008363	0.02341	0	2
biological process	sensory organ precursor cell fate determination	GO:0016360	0.02341	0	2
biological process	leg disc pattern formation	GO:0035223	0.02341	0	2
biological process	cell fate determination involved in pattern specification	GO:0060582	0.02341	0	2
biological process	trehalose biosynthetic process	GO:0005992	0.02443	0	1
biological process	asparagine metabolic process	GO:0006528	0.02443	0	1
biological process	sphingomyelin catabolic process	GO:0006685	0.02443	0	1
biological process	oligopeptide transport	GO:0006857	0.02443	0	1
biological process	pyridoxine metabolic process	GO:0008614	0.02443	0	1
biological process	pyridoxine biosynthetic process	GO:0008615	0.02443	0	1
biological process	catechol-containing compound biosynthetic process	GO:0009713	0.02443	0	1
biological process	protein kinase A signaling	GO:0010737	0.02443	0	1
biological process	regulation of protein kinase A signaling	GO:0010738	0.02443	0	1
biological process	negative regulation of ATPase activity	GO:0032780	0.02443	0	1
biological process	copper ion transmembrane transport	GO:0035434	0.02443	0	1
biological process	dopamine biosynthetic process	GO:0042416	0.02443	0	1
biological process	catecholamine biosynthetic process	GO:0042423	0.02443	0	1
biological process	serotonin biosynthetic process	GO:0042427	0.02443	0	1
biological process	disaccharide biosynthetic process	GO:0046351	0.02443	0	1
biological process	primary amino compound biosynthetic process	GO:1901162	0.02443	0	1
biological process	small molecule metabolic process	GO:0044281	0.02468	0	15
biological process	imaginal disc pattern formation	GO:0007447	0.0248	0	4
biological process	R3/R4 cell fate commitment	GO:0007464	0.02495	0	2
biological process	animal organ formation	GO:0048645	0.02524	0	3
biological process	cuticle development involved in chitin-based cuticle molting cycle	GO:0042337	0.02653	0	2
biological process	compound eye cone cell differentiation	GO:0042675	0.02653	0	2
biological process	R3/R4 cell differentiation	GO:0048056	0.02653	0	2
biological process	regulation of developmental pigmentation	GO:0048070	0.02653	0	2
biological process	compound eye photoreceptor fate commitment	GO:0001752	0.02786	0	3
biological process	formation of anatomical boundary	GO:0048859	0.02786	0	3
biological process	immune effector process	GO:0002252	0.02851	0	4
biological process	mating behavior	GO:0007617	0.02851	0	4
biological process	eye photoreceptor cell fate commitment	GO:0042706	0.02968	0	3
biological process	defense response	GO:0006952	0.0298	0	8
biological process	R7 cell development	GO:0045467	0.02981	0	2
biological process	R8 cell differentiation	GO:0045465	0.03151	0	2
biological process	sensory perception	GO:0007600	0.03239	0	14
biological process	conditioned taste aversion	GO:0001661	0.03244	0	1
biological process	polyamine biosynthetic process	GO:0006596	0.03244	0	1
biological process	sphingomyelin metabolic process	GO:0006684	0.03244	0	1
biological process	phospholipid catabolic process	GO:0009395	0.03244	0	1
biological process	scab formation	GO:0035314	0.03244	0	1
biological process	vitamin B6 biosynthetic process	GO:0042819	0.03244	0	1
biological process	pyridoxal phosphate metabolic process	GO:0042822	0.03244	0	1
biological process	pyridoxal phosphate biosynthetic process	GO:0042823	0.03244	0	1
biological process	nucleobase catabolic process	GO:0046113	0.03244	0	1
biological process	aldehyde biosynthetic process	GO:0046184	0.03244	0	1
biological process	mitotic spindle midzone assembly	GO:0051256	0.03244	0	1
biological process	mitochondrial translational elongation	GO:0070125	0.03244	0	1
biological process	cellular response to light intensity	GO:0071484	0.03244	0	1
biological process	olfactory bulb axon guidance	GO:0071678	0.03244	0	1
biological process	developmental maturation	GO:0021700	0.033	0	6
biological process	regulation of imaginal disc-derived wing size	GO:0044719	0.03324	0	2
biological process	developmental cell growth	GO:0048588	0.03352	0	3
biological process	immune response	GO:0006955	0.03393	0	7
biological process	photoreceptor cell fate commitment	GO:0046552	0.03451	0	3
biological process	system process	GO:0003008	0.03469	0	17
biological process	small molecule biosynthetic process	GO:0044283	0.03734	0	5
biological process	establishment of ommatidial planar polarity	GO:0042067	0.0376	0	3
biological process	negative regulation of hydrolase activity	GO:0051346	0.0376	0	3
biological process	tissue development	GO:0009888	0.03767	0	17
biological process	cellular amino acid biosynthetic process	GO:0008652	0.03867	0	2
biological process	appendage segmentation	GO:0035285	0.03867	0	2
biological process	imaginal disc-derived leg segmentation	GO:0036011	0.03867	0	2
biological process	nervous system process	GO:0050877	0.03881	0	16
biological process	regulation of multi-organism process	GO:0043900	0.03916	0	4
biological process	galactose metabolic process	GO:0006012	0.04038	0	1
biological process	cellular copper ion homeostasis	GO:0006878	0.04038	0	1
biological process	female pronucleus assembly	GO:0035038	0.04038	0	1
biological process	preblastoderm mitotic cell cycle	GO:0035185	0.04038	0	1
biological process	water-soluble vitamin biosynthetic process	GO:0042364	0.04038	0	1
biological process	negative regulation of compound eye cone cell fate specification	GO:0042683	0.04038	0	1
biological process	vitamin B6 metabolic process	GO:0042816	0.04038	0	1
biological process	dicarboxylic acid catabolic process	GO:0043649	0.04038	0	1
biological process	pyrimidine-containing compound catabolic process	GO:0072529	0.04038	0	1
biological process	phagosome maturation	GO:0090382	0.04038	0	1
biological process	courtship behavior	GO:0007619	0.04082	0	3
biological process	neuron fate commitment	GO:0048663	0.04082	0	3
biological process	reproductive behavior	GO:0019098	0.04153	0	4
biological process	memory	GO:0007613	0.04234	0	4
biological process	long-term memory	GO:0007616	0.04532	0	3
biological process	cell fate commitment	GO:0045165	0.04532	0	9
biological process	mRNA transport	GO:0051028	0.04638	0	2
biological process	polyamine metabolic process	GO:0006595	0.04826	0	1
biological process	pteridine biosynthetic process	GO:0006728	0.04826	0	1
biological process	grooming behavior	GO:0007625	0.04826	0	1
biological process	vitamin biosynthetic process	GO:0009110	0.04826	0	1
biological process	folic acid-containing compound biosynthetic process	GO:0009396	0.04826	0	1
biological process	follicle cell microvillus organization	GO:0032529	0.04826	0	1
biological process	serotonin metabolic process	GO:0042428	0.04826	0	1
biological process	sulfation	GO:0051923	0.04826	0	1
biological process	primary amino compound metabolic process	GO:1901160	0.04826	0	1
biological process	negative regulation of proteolysis	GO:0045861	0.04885	0	3
molecular function	catechol oxidase activity	GO:0004097	0.00018	0	2
molecular function	oxidoreductase activity, acting on diphenols and related substances as donors, oxygen as acceptor	GO:0016682	0.00018	0	2
molecular function	L-DOPA monooxygenase activity	GO:0036263	0.00018	0	2
molecular function	dopamine monooxygenase activity	GO:0036264	0.00018	0	2
molecular function	cyclo-ligase activity	GO:0016882	0.00036	0	2
molecular function	serine-type endopeptidase activity	GO:0004252	0.00063	0	9
molecular function	serine-type peptidase activity	GO:0008236	0.00105	0	9
molecular function	serine hydrolase activity	GO:0017171	0.00107	0	9
molecular function	hydroxymethyl-, formyl- and related transferase activity	GO:0016742	0.00126	0	2
molecular function	catalytic activity	GO:0003824	0.003	0	47
molecular function	oxidoreductase activity	GO:0016491	0.00384	0	13
molecular function	cadherin binding	GO:0045296	0.00452	0	2
molecular function	structural constituent of cytoskeleton	GO:0005200	0.00707	0	3
molecular function	oxidoreductase activity, acting on diphenols and related substances as donors	GO:0016679	0.00773	0	2
molecular function	ligase activity	GO:0016874	0.00781	0	5
molecular function	ligase activity, forming carbon-nitrogen bonds	GO:0016879	0.00788	0	3
molecular function	beta-alanyl-dopamine synthase activity	GO:0003833	0.00789	0	1
molecular function	GTP cyclohydrolase activity	GO:0003933	0.00789	0	1
molecular function	GTP cyclohydrolase I activity	GO:0003934	0.00789	0	1
molecular function	aromatic-L-amino-acid decarboxylase activity	GO:0004058	0.00789	0	1
molecular function	aspartate 1-decarboxylase activity	GO:0004068	0.00789	0	1
molecular function	mannose binding	GO:0005537	0.00789	0	1
molecular function	formyltetrahydrofolate dehydrogenase activity	GO:0016155	0.00789	0	1
molecular function	acyl-CoA N-acyltransferase activity	GO:0019186	0.00789	0	1
molecular function	5-formyltetrahydrofolate cyclo-ligase activity	GO:0030272	0.00789	0	1
molecular function	GTP cyclohydrolase I regulator activity	GO:0060308	0.00789	0	1
molecular function	endopeptidase activity	GO:0004175	0.00974	0	9
molecular function	DNA-binding transcription factor activity	GO:0003700	0.01161	0	8
molecular function	peptidase activity, acting on L-amino acid peptides	GO:0070011	0.01211	0	11
molecular function	peptidase activity	GO:0008233	0.0145	0	11
molecular function	amidophosphoribosyltransferase activity	GO:0004044	0.01572	0	1
molecular function	asparagine synthase (glutamine-hydrolyzing) activity	GO:0004066	0.01572	0	1
molecular function	dopachrome isomerase activity	GO:0004167	0.01572	0	1
molecular function	monophenol monooxygenase activity	GO:0004503	0.01572	0	1
molecular function	calcium- and calmodulin-responsive adenylate cyclase activity	GO:0008294	0.01572	0	1
molecular function	oxidoreductase activity, acting on paired donors, with incorporation or reduction of molecular oxygen, another compound as one donor, and incorporation of one a...	GO:0016716	0.01572	0	1
molecular function	calcium-dependent phospholipase A2 activity	GO:0047498	0.01572	0	1
molecular function	carboxy-lyase activity	GO:0016831	0.01896	0	2
molecular function	proximal promoter DNA-binding transcription repressor activity, RNA polymerase II-specific	GO:0001078	0.02171	0	2
molecular function	transcription factor activity, RNA polymerase II distal enhancer sequence-specific binding	GO:0003705	0.02193	0	3
molecular function	DNA-binding transcription repressor activity, RNA polymerase II-specific	GO:0001227	0.02314	0	2
molecular function	G protein-coupled receptor activity	GO:0004930	0.02329	0	4
molecular function	beta-galactosidase activity	GO:0004565	0.02348	0	1
molecular function	phosphoribosylamine-glycine ligase activity	GO:0004637	0.02348	0	1
molecular function	phosphoribosylformylglycinamidine cyclo-ligase activity	GO:0004641	0.02348	0	1
molecular function	phosphoribosylglycinamide formyltransferase activity	GO:0004644	0.02348	0	1
molecular function	pyridoxamine-phosphate oxidase activity	GO:0004733	0.02348	0	1
molecular function	trehalose-phosphatase activity	GO:0004805	0.02348	0	1
molecular function	protein C-terminus binding	GO:0008022	0.02348	0	1
molecular function	galactosidase activity	GO:0015925	0.02348	0	1
molecular function	cyclohydrolase activity	GO:0019238	0.02348	0	1
molecular function	ATPase inhibitor activity	GO:0042030	0.02348	0	1
molecular function	fucose binding	GO:0042806	0.02348	0	1
molecular function	C2H2 zinc finger domain binding	GO:0070742	0.02348	0	1
molecular function	transcription regulator activity	GO:0140110	0.02672	0	8
molecular function	DNA-binding transcription factor activity, RNA polymerase II-specific	GO:0000981	0.02703	0	5
molecular function	phospholipase activity	GO:0004620	0.03087	0	2
molecular function	transferase activity, transferring sulfur-containing groups	GO:0016782	0.03087	0	2
molecular function	carbon-carbon lyase activity	GO:0016830	0.03087	0	2
molecular function	TFIID-class transcription factor complex binding	GO:0001094	0.03119	0	1
molecular function	aralkylamine N-acetyltransferase activity	GO:0004059	0.03119	0	1
molecular function	frizzled binding	GO:0005109	0.03119	0	1
molecular function	carboxylic ester hydrolase activity	GO:0052689	0.03297	0	3
molecular function	pyridoxal phosphate binding	GO:0030170	0.03593	0	2
molecular function	vitamin B6 binding	GO:0070279	0.03593	0	2
molecular function	long-chain fatty acid-CoA ligase activity	GO:0004467	0.03883	0	1
molecular function	sphingomyelin phosphodiesterase activity	GO:0004767	0.03883	0	1
molecular function	DNA binding, bending	GO:0008301	0.03883	0	1
molecular function	intramolecular oxidoreductase activity, transposing C=C bonds	GO:0016863	0.03883	0	1
molecular function	carbohydrate phosphatase activity	GO:0019203	0.03883	0	1
molecular function	microfilament motor activity	GO:0000146	0.04642	0	1
molecular function	fatty acid ligase activity	GO:0015645	0.04642	0	1
molecular function	cell adhesion molecule binding	GO:0050839	0.04885	0	2
cellular component	extracellular region	GO:0005576	1.4e-06	0	21
cellular component	extracellular region part	GO:0044421	0.0026	0	11
cellular component	chorion	GO:0042600	0.0028	0	3
cellular component	external encapsulating structure	GO:0030312	0.0038	0	3
cellular component	female germline ring canal	GO:0035324	0.0095	0	2
cellular component	axoneme	GO:0005930	0.0121	0	2
cellular component	ciliary plasm	GO:0097014	0.0121	0	2
cellular component	somatic ring canal	GO:0098549	0.0129	0	1
cellular component	plasma membrane bounded cell projection cytoplasm	GO:0032838	0.013	0	2
cellular component	nuclear pre-replicative complex	GO:0005656	0.0193	0	1
cellular component	pre-replicative complex	GO:0036387	0.0193	0	1
cellular component	phagocytic vesicle	GO:0045335	0.0193	0	1
cellular component	germline ring canal	GO:0045172	0.0225	0	2
cellular component	polymeric cytoskeletal fiber	GO:0099513	0.0231	0	4
cellular component	endocytic vesicle	GO:0030139	0.0237	0	2
cellular component	male germline ring canal	GO:0035323	0.0256	0	1
cellular component	micropyle	GO:0070825	0.0256	0	1
cellular component	intercellular bridge	GO:0045171	0.0261	0	2
cellular component	extracellular space	GO:0005615	0.0311	0	7
cellular component	myosin VII complex	GO:0031477	0.0319	0	1
cellular component	external encapsulating structure part	GO:0044462	0.0319	0	1
cellular component	bursicon neuropeptide hormone complex	GO:0031395	0.0382	0	1
cellular component	cortical microtubule	GO:0055028	0.0382	0	1
cellular component	transcription export complex 2	GO:0070390	0.0382	0	1
cellular component	DUBm complex	GO:0071819	0.0382	0	1
cellular component	ciliary part	GO:0044441	0.0383	0	2
cellular component	female germline ring canal outer rim	GO:0035182	0.0444	0	1
cellular component	cytoplasmic region	GO:0099568	0.0458	0	4
cellular component	membrane	GO:0016020	0.0477	0	36
